# Supplementary material for: SWISS-MODEL: homology modelling of protein structures and complexes
Source: PubMed Central journal article supplement (PMC6030848; doi:10.1093/nar/gky427), 2018-05-21
Supplement: gky427_supplemental_files.pdf [file gky427_supplemental_files.pdf]

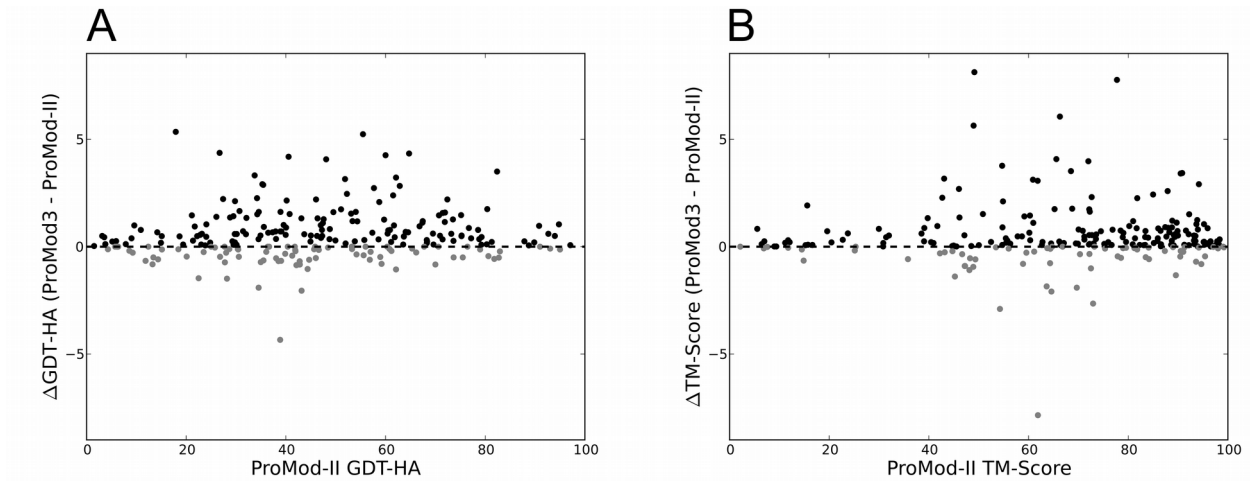

Supplementary Figure 1. Performance comparison between ProMod-II and ProMod3 modelling engines. Performance is measured on a benchmark dataset of 250 targets collected during the CAMEO time range 2017-10-20 - 2018-01-13. For each target, the same template and target-template alignment were used as input for both modelling engines. Every data point represents the difference in model accuracy in terms of (A) GDT-HA and (B) TM-Score. ProMod3 shows an average improvement of 0.54 GDT-HA points and 0.46 TM-Score points (statistically significant difference, P-values:  $1.45\text{E-}11$  and  $9.96\text{E-}07$  based on paired t-test).

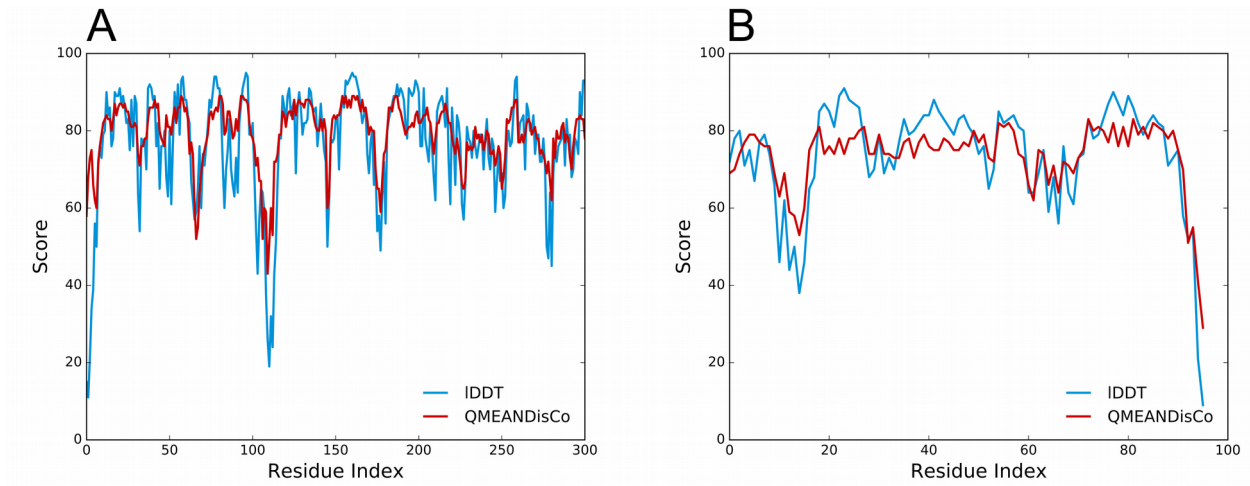

Supplementary Figure 2. Model confidence evaluation of (A) Ferredoxin-NADP+ Reductase and (B) Ferredoxin. Per residue quality estimates from QMEANDisCo are compared to the measured quality by all-atom IDDT scores (Pearson correlation on full complex: 0.80).

**Raw data – Response Time**

| <b>Target</b>         | <b>SWISS-MODEL</b> | <b>HHpredB</b> | <b>NaiveB LAST</b> | <b>PRIMO</b> | <b>SPARKS-X</b> | <b>Raptor X</b> | <b>IntFOLD4 -TS</b> | <b>Robetta</b> |
|-----------------------|--------------------|----------------|--------------------|--------------|-----------------|-----------------|---------------------|----------------|
| 2018-01-13_00000090_1 | 00:21:17           | 00:28:01       | 02:57:12           | 01:16:40     | 02:21:17        | 06:45:46        | 39:33:23            | 64:00:01       |
| 2018-01-13_00000073_1 | 00:06:49           | 00:23:46       | 02:57:12           | 00:53:25     | 02:10:49        | 07:16:32        | 30:57:54            | 63:29:46       |
| 2018-01-13_00000068_1 | 00:06:32           | 00:24:17       | 00:00:00           | 00:46:56     | 02:08:33        | 07:19:03        | 31:04:36            | 63:46:17       |
| 2018-01-13_00000066_2 | 00:33:05           | 00:26:02       | 02:57:12           | 01:03:40     | 01:31:05        | 05:37:46        | 28:44:09            | 33:40:01       |
| 2018-01-13_00000062_1 | 00:04:22           | 00:24:20       | 00:00:02           | 00:48:57     | 01:28:22        | 05:20:04        | 28:44:26            | 37:35:20       |
| 2018-01-13_00000057_1 | 00:18:09           | 00:30:53       | 00:00:36           | 00:53:32     | 01:28:10        | 05:08:38        | 29:39:14            | 32:51:53       |
| 2018-01-13_00000055_1 | 00:03:56           | 00:32:41       | 00:00:23           | 00:58:20     | 01:48:56        | 05:22:26        | 35:08:02            | 32:17:41       |
| 2018-01-13_00000054_1 | 00:13:44           | 00:29:27       | 00:00:10           | 00:44:06     | 01:20:45        | 04:38:12        | 30:47:49            | 30:32:27       |
| 2018-01-13_00000050_1 | 00:05:56           | 00:37:40       | 00:00:21           | 00:48:17     | 01:47:57        | 05:01:23        | 36:54:00            | 38:30:39       |
| 2018-01-13_00000047_1 | 00:02:31           | 00:27:27       | 00:00:08           | 00:24:04     | 01:12:32        | 03:56:10        | 32:08:36            | 41:52:27       |
| 2018-01-13_00000045_2 | 00:06:22           | 00:31:05       | 02:57:12           | 00:40:41     | 01:58:22        | 02:59:47        | 33:23:28            | 44:57:04       |
| 2018-01-13_00000045_1 | 00:02:56           | 00:28:55       | 00:00:36           | 00:18:32     | 00:29:56        | 01:11:38        | 20:46:02            | 17:03:54       |
| 2018-01-13_00000043_1 | 00:07:43           | 00:36:28       | 00:00:10           | 00:29:06     | 00:44:44        | 00:56:13        | 30:11:49            | 21:48:28       |
| 2018-01-13_00000040_1 | 01:23:24           | 00:50:20       | 00:00:57           | 01:49:52     | 00:39:24        | 04:00:59        | 50:07:29            | 44:03:20       |
| 2018-01-13_00000004_1 | 00:08:03           | 00:39:48       | 00:00:09           | 00:26:05     | 00:45:03        | 01:33:20        | 34:16:13            | 24:51:46       |
| 2018-01-06_00000180_1 | 00:14:59           | 00:51:43       | 00:00:25           | 01:50:21     | 01:17:00        | 24:35:27        | 40:25:05            | 74:19:43       |
| 2018-01-06_00000178_1 | 00:26:36           | 00:52:33       | 00:00:13           | 01:52:09     | 01:10:37        | 20:33:16        | 39:25:42            | 72:31:32       |
| 2018-01-06_00000118_1 | 00:05:10           | 00:53:53       | 02:57:39           | 01:03:30     | 00:53:11        | 13:29:35        | 28:12:16            | 63:13:53       |
| 2018-01-06_00000114_1 | 00:02:59           | 00:51:44       | 02:57:39           | 00:54:20     | 01:01:59        | 13:35:27        | 29:24:04            | 63:14:43       |
| 2018-01-06_00000107_1 | 00:04:48           | 00:56:33       | 00:00:11           | 00:55:07     | 00:48:49        | 11:31:13        | 28:09:52            | 60:13:33       |
| 2018-01-06_00000105_1 | 00:16:33           | 01:06:22       | 00:00:00           | 01:09:55     | 01:10:34        | 10:45:03        | 34:05:37            | 67:45:22       |
| 2017-12-23_00000093_1 | 00:05:03           | 00:53:48       | 02:58:28           | 01:15:26     | 01:03:05        | 10:09:33        | 40:42:08            | 37:52:48       |
| 2017-12-23_00000090_1 | 00:05:48           | 00:52:33       | 00:00:15           | 00:55:11     | 00:58:49        | 08:37:17        | 40:40:53            | 36:56:32       |
| 2017-12-23_00000089_1 | 00:01:34           | 00:50:18       | 00:00:00           | 00:45:57     | 00:50:35        | 07:59:02        | 22:07:38            | 36:47:17       |
| 2017-12-23_00000086_1 | 00:13:18           | 01:06:02       | 02:58:28           | 01:14:41     | 01:46:20        | 08:59:47        | 50:26:24            | 37:00:02       |
| 2017-12-23_00000084_1 | 00:07:53           | 01:05:50       | 00:00:31           | 01:13:27     | 00:45:54        | 09:08:33        | 50:37:58            | 40:50:50       |
| 2017-12-23_00000066_1 | 00:03:39           | 00:55:24       | 00:00:05           | 00:57:01     | 00:59:41        | 08:22:07        | 43:21:45            | 28:22:24       |
| 2017-12-23_00000047_1 | 00:03:58           | 00:55:56       | 00:00:40           | 00:44:36     | 00:55:00        | 06:50:42        | 41:43:03            | 38:00:55       |
| 2017-12-23_00000046_1 | 00:13:46           | 01:03:31       | 00:00:11           | 00:53:06     | 00:58:47        | 07:14:13        | 45:52:50            | 36:06:30       |
| 2017-12-23_00000041_1 | 00:38:18           | 01:08:16       | 02:58:28           | 00:40:54     | 00:44:19        | 05:55:00        | 50:18:23            | 24:21:16       |
| 2017-12-23_00000040_1 | 00:04:05           | 00:57:49       | 02:58:28           | 00:25:27     | 00:27:06        | 04:58:33        | 37:16:11            | 25:57:49       |
| 2017-12-23_00000039_1 | 00:23:53           | 01:05:37       | 00:00:19           | 00:45:15     | 01:00:55        | 06:11:21        | 50:30:00            | 36:50:36       |

|                       |          |          |          |          |          |          |          |          |
|-----------------------|----------|----------|----------|----------|----------|----------|----------|----------|
| 2017-12-23_00000038_1 | 00:07:30 | 01:04:26 | 00:00:08 | 00:32:04 | 00:35:33 | 05:46:10 | 46:12:36 | 29:45:26 |
| 2017-12-23_00000027_1 | 00:02:19 | 01:02:04 | 02:58:28 | 00:22:40 | 00:21:20 | 06:13:48 | 38:49:25 | 23:18:03 |
| 2017-12-23_00000021_2 | 00:02:57 | 01:06:42 | 00:00:25 | 00:19:21 | 00:17:58 | 03:39:28 | 41:51:01 | 17:53:41 |
| 2017-12-23_00000015_1 | 00:01:45 | 01:01:28 | 00:00:09 | 00:02:05 | 00:04:46 | 02:03:12 | 16:33:50 | 27:02:27 |
| 2017-12-23_00000001_1 | 00:05:49 | 00:04:33 | 02:58:28 | 00:26:53 | 00:40:51 | 02:53:10 | 43:10:03 | 26:04:32 |
| 2017-12-16_00000160_1 | 01:25:37 | 00:43:21 | 00:00:01 | 01:34:57 | 01:15:37 | 06:15:03 | 32:02:40 | 49:20:21 |
| 2017-12-16_00000124_1 | 00:15:09 | 00:42:05 | 02:58:48 | 01:43:44 | 01:16:09 | 06:38:50 | 29:49:13 | 37:29:05 |
| 2017-12-16_00000109_1 | 00:06:51 | 00:49:37 | 00:00:21 | 01:33:17 | 01:01:52 | 10:26:22 | 47:18:56 | 38:36:36 |
| 2017-12-16_00000096_1 | 01:35:23 | 00:45:22 | 00:00:04 | 01:38:00 | 01:07:24 | 05:31:07 | 30:44:29 | 38:39:21 |
| 2017-12-16_00000083_1 | 00:12:40 | 00:47:38 | 00:00:21 | 01:16:17 | 01:16:41 | 05:17:24 | 49:58:46 | 31:55:37 |
| 2017-12-16_00000061_1 | 00:10:49 | 00:43:48 | 00:01:30 | 01:51:26 | 00:45:50 | 04:42:32 | 56:37:55 | 55:05:48 |
| 2017-12-16_00000058_1 | 00:14:31 | 00:45:25 | 00:00:03 | 00:58:59 | 01:15:31 | 06:42:06 | 38:16:34 | 37:13:24 |
| 2017-12-16_00000045_2 | 00:53:05 | 00:46:01 | 02:58:48 | 00:49:38 | 00:41:05 | 03:24:45 | 29:58:10 | 26:57:01 |
| 2017-12-16_00000044_2 | 00:54:52 | 00:46:36 | 00:00:18 | 00:40:14 | 00:39:52 | 03:25:21 | 29:49:55 | 21:36:35 |
| 2017-12-16_00000018_1 | 00:16:02 | 00:55:45 | 00:00:26 | 01:01:22 | 00:23:03 | 02:55:29 | 52:08:05 | 26:21:45 |
| 2017-12-16_00000009_1 | 01:02:35 | 00:54:34 | 00:00:15 | 00:52:10 | 01:30:35 | 01:25:17 | 36:50:40 | 20:47:33 |
| 2017-12-16_00000002_1 | 00:01:56 | 00:44:53 | 02:58:48 | 00:14:32 | 00:19:57 | 00:24:38 | 25:46:00 | 07:42:52 |
| 2017-12-16_00000000_1 | 00:02:47 | 00:46:30 | 02:58:48 | 00:16:51 | 00:45:48 | 02:51:02 | 34:24:04 | 27:24:29 |
| 2017-12-09_00000061_1 | 00:06:53 | 05:45:37 | 00:00:18 | 01:22:14 | 01:20:54 | 16:54:21 | 27:31:57 | 65:55:37 |
| 2017-12-09_00000060_1 | 00:07:25 | 05:46:23 | 00:00:06 | 01:16:01 | 01:17:26 | 19:14:08 | 29:11:29 | 65:58:22 |
| 2017-12-09_00000058_1 | 00:26:13 | 05:47:57 | 02:59:09 | 01:09:32 | 01:12:13 | 15:40:39 | 36:16:17 | 68:24:57 |
| 2017-12-09_00000057_1 | 00:04:02 | 05:51:45 | 00:00:25 | 01:31:21 | 01:54:02 | 14:33:28 | 33:06:08 | 38:55:44 |
| 2017-12-09_00000051_1 | 00:09:54 | 05:48:38 | 00:00:16 | 01:09:11 | 01:25:54 | 13:02:20 | 31:28:59 | 36:15:37 |
| 2017-12-09_00000050_1 | 00:09:43 | 05:50:27 | 00:00:07 | 01:02:03 | 01:05:43 | 12:14:09 | 29:41:49 | 35:13:27 |
| 2017-12-09_00000048_1 | 00:14:32 | 05:58:17 | 02:59:09 | 01:17:54 | 01:32:32 | 14:37:02 | 33:30:37 | 33:22:17 |
| 2017-12-09_00000046_1 | 00:11:23 | 05:50:06 | 02:59:09 | 00:39:41 | 01:14:24 | 10:31:48 | 32:32:29 | 21:40:06 |
| 2017-12-09_00000040_1 | 00:05:16 | 05:51:00 | 02:59:09 | 00:44:33 | 00:46:16 | 14:42:43 | 46:59:21 | 76:26:59 |
| 2017-12-09_00000037_1 | 00:01:49 | 05:45:47 | 02:59:09 | 00:29:25 | 00:47:49 | 08:15:32 | 23:50:53 | 11:54:47 |
| 2017-12-09_00000021_1 | 00:02:09 | 05:45:53 | 02:59:09 | 00:14:26 | 00:23:10 | 06:26:34 | 18:46:15 | 36:37:52 |
| 2017-12-09_00000018_1 | 00:59:47 | 06:09:43 | 00:00:23 | 00:52:19 | 01:19:47 | 06:36:26 | 37:24:52 | 19:41:42 |
| 2017-12-09_00000015_1 | 00:11:31 | 06:15:23 | 00:01:00 | 02:16:56 | 00:29:32 | 05:47:02 | 49:15:38 | 33:13:23 |
| 2017-12-09_00000010_2 | 00:38:10 | 05:55:08 | 02:59:09 | 00:14:42 | 00:16:10 | 02:26:51 | 24:39:16 | 10:11:07 |
| 2017-12-09_00000008_2 | 00:01:58 | 05:51:43 | 00:00:24 | 00:07:20 | 00:09:58 | 02:04:27 | 23:11:03 | 05:34:43 |
| 2017-12-09_00000005_1 | 00:02:22 | 05:54:06 | 02:59:09 | 00:04:41 | 00:04:23 | 01:32:50 | 17:31:27 | 17:03:06 |
| 2017-12-09_00000004_1 | 00:02:25 | 05:55:10 | 02:59:09 | 00:04:31 | 00:05:26 | 01:07:46 | 21:21:35 | 21:59:09 |

|                       |          |          |          |          |          |          |          |          |
|-----------------------|----------|----------|----------|----------|----------|----------|----------|----------|
| 2017-12-02_00000122_1 | 00:02:36 | 00:38:19 | 00:00:02 | 01:39:57 | 01:05:37 | 14:29:05 | 24:00:42 | 20:39:18 |
| 2017-12-02_00000116_1 | 00:15:10 | 00:46:07 | 02:59:25 | 01:50:46 | 01:59:11 | 14:41:52 | 30:46:16 | 25:15:06 |
| 2017-12-02_00000114_1 | 02:25:01 | 00:59:44 | 00:00:24 | 02:10:20 | 01:03:02 | 15:26:27 | 45:22:05 | 76:27:44 |
| 2017-12-02_00000109_1 | 00:09:32 | 00:40:31 | 02:59:25 | 01:05:09 | 00:48:33 | 12:59:15 | 23:01:38 | 31:02:30 |
| 2017-12-02_00000106_1 | 00:51:22 | 00:46:06 | 02:59:25 | 01:15:42 | 01:00:23 | 13:27:49 | 27:32:28 | 25:54:05 |
| 2017-12-02_00000102_1 | 00:13:11 | 00:40:56 | 02:59:25 | 01:07:32 | 01:05:12 | 12:21:39 | 27:55:15 | 35:16:55 |
| 2017-12-02_00000078_1 | 00:12:44 | 00:39:40 | 00:00:23 | 00:57:19 | 00:53:45 | 12:17:26 | 27:01:50 | 26:21:40 |
| 2017-12-02_00000076_1 | 00:09:31 | 00:40:15 | 02:59:25 | 00:53:54 | 00:51:32 | 10:18:00 | 26:54:35 | 27:20:15 |
| 2017-12-02_00000071_1 | 00:13:19 | 00:48:02 | 02:59:25 | 01:03:39 | 01:17:20 | 10:30:46 | 33:01:23 | 34:23:02 |
| 2017-12-02_00000070_1 | 00:43:55 | 00:50:52 | 00:00:31 | 01:05:27 | 01:25:56 | 10:54:33 | 34:57:01 | 28:36:52 |
| 2017-12-02_00000069_1 | 00:05:46 | 00:43:29 | 00:00:10 | 01:16:05 | 00:36:47 | 07:59:12 | 35:57:50 | 31:50:29 |
| 2017-12-02_00000058_1 | 00:06:09 | 00:42:52 | 00:00:34 | 00:35:30 | 00:47:10 | 05:40:37 | 28:32:13 | 14:19:51 |
| 2017-12-02_00000048_1 | 00:25:46 | 00:56:29 | 00:00:10 | 00:39:06 | 00:49:47 | 04:49:12 | 30:28:51 | 24:43:29 |
| 2017-12-02_00000042_2 | 00:05:20 | 00:49:18 | 02:59:25 | 00:16:55 | 00:30:21 | 03:52:02 | 27:35:24 | 23:27:17 |
| 2017-12-02_00000042_1 | 00:05:07 | 00:49:51 | 02:59:25 | 00:21:28 | 00:32:08 | 02:33:35 | 29:49:11 | 25:14:51 |
| 2017-12-02_00000030_1 | 00:06:31 | 00:49:14 | 02:59:25 | 00:22:51 | 00:29:32 | 01:43:58 | 29:59:36 | 09:49:13 |
| 2017-12-02_00000023_1 | 00:04:37 | 00:50:20 | 02:59:25 | 00:23:40 | 00:33:38 | 01:58:52 | 27:12:48 | 19:55:19 |
| 2017-11-25_00000069_1 | 00:04:23 | 00:45:07 | 02:59:50 | 15:34:43 | 01:49:24 | 16:20:50 | 24:32:29 | 37:11:07 |
| 2017-11-25_00000066_1 | 00:10:59 | 00:50:56 | 00:00:36 | 15:34:33 | 01:43:00 | 28:11:39 | 40:34:05 | 46:41:55 |
| 2017-11-25_00000061_1 | 00:06:44 | 00:49:29 | 00:00:12 | 15:15:09 | 01:32:44 | 13:48:14 | 33:01:47 | 37:06:28 |
| 2017-11-25_00000060_1 | 00:17:29 | 00:52:14 | 02:59:50 | 15:09:51 | 02:28:30 | 13:23:59 | 31:56:33 | 36:51:14 |
| 2017-11-25_00000056_1 | 00:07:03 | 00:51:01 | 02:59:50 | 15:03:37 | 01:43:04 | 11:31:44 | 29:39:08 | 36:38:00 |
| 2017-11-25_00000055_1 | 00:07:51 | 00:49:34 | 00:00:15 | 14:58:12 | 01:21:51 | 11:54:18 | 32:35:54 | 39:43:33 |
| 2017-11-25_00000050_1 | 00:23:15 | 00:56:59 | 00:00:38 | 14:49:34 | 01:12:15 | 10:21:42 | 35:01:20 | 37:45:58 |
| 2017-11-25_00000043_1 | 00:07:02 | 00:57:46 | 00:00:28 | 14:42:24 | 01:23:02 | 09:11:31 | 26:33:05 | 20:04:45 |
| 2017-11-25_00000041_1 | 00:06:48 | 00:57:33 | 00:00:13 | 14:42:09 | 01:01:48 | 08:40:16 | 41:27:51 | 30:19:32 |
| 2017-11-25_00000035_1 | 00:15:56 | 01:05:55 | 00:00:36 | 14:34:32 | 00:40:57 | 07:52:39 | 52:37:00 | 37:03:55 |
| 2017-11-25_00000030_1 | 00:07:43 | 00:56:27 | 00:00:08 | 14:28:04 | 00:41:44 | 07:32:11 | 25:36:47 | 19:56:27 |
| 2017-11-25_00000022_1 | 00:13:32 | 01:02:15 | 02:59:50 | 14:27:51 | 00:24:33 | 04:04:59 | 39:02:36 | 24:31:15 |
| 2017-11-25_00000021_1 | 00:04:27 | 00:56:05 | 02:59:50 | 11:52:40 | 00:29:28 | 01:59:48 | 24:36:33 | 09:23:04 |
| 2017-11-25_00000020_1 | 00:03:17 | 00:59:02 | 02:59:50 | 11:31:38 | 00:24:18 | 02:11:46 | 26:23:22 | 06:44:01 |
| 2017-11-25_00000018_1 | 00:06:03 | 01:06:48 | 00:00:31 | 11:10:27 | 00:47:04 | 01:52:33 | 32:06:07 | 11:23:48 |
| 2017-11-25_00000017_1 | 00:02:52 | 01:00:35 | 00:00:15 | 11:11:11 | 00:05:53 | 01:10:19 | 21:02:57 | 15:09:35 |
| 2017-11-25_00000007_1 | 00:07:53 | 01:01:38 | 00:00:06 | 11:10:01 | 00:27:54 | 04:14:15 | 29:08:01 | 16:21:37 |
| 2017-11-18_00000073_1 | 00:07:05 | 00:12:50 | 03:00:06 | 00:44:28 | 01:16:06 | 09:05:36 | 20:19:11 | 48:40:50 |

|                       |          |          |          |          |          |          |          |          |
|-----------------------|----------|----------|----------|----------|----------|----------|----------|----------|
| 2017-11-18_00000069_1 | 00:06:39 | 00:13:37 | 03:00:06 | 00:47:14 | 01:10:39 | 06:53:21 | 20:50:43 | 48:23:36 |
| 2017-11-18_00000068_1 | 00:09:13 | 00:25:10 | 03:00:06 | 01:05:47 | 01:34:13 | 07:15:54 | 32:41:17 | 42:15:09 |
| 2017-11-18_00000014_1 | 01:01:39 | 00:24:36 | 00:00:19 | 00:36:15 | 01:39:39 | 04:59:22 | 33:20:44 | 39:53:36 |
| 2017-11-18_00000009_1 | 00:15:29 | 00:26:12 | 00:00:52 | 01:02:48 | 00:36:29 | 06:34:54 | 33:57:32 | 34:42:11 |
| 2017-11-11_00000093_1 | 00:18:33 | 00:22:25 | 00:00:05 | 00:43:01 | 01:33:33 | 04:45:09 | 20:29:39 | 62:48:24 |
| 2017-11-11_00000092_1 | 00:18:11 | 00:22:09 | 03:00:25 | 00:34:42 | 01:33:12 | 06:25:49 | 19:37:22 | 62:49:08 |
| 2017-11-11_00000086_1 | 00:30:09 | 00:31:52 | 03:00:25 | 00:43:26 | 01:36:10 | 04:05:34 | 22:57:14 | 62:54:51 |
| 2017-11-11_00000077_1 | 00:27:47 | 00:27:43 | 00:00:22 | 01:15:18 | 01:27:49 | 07:21:24 | 32:03:55 | 62:57:43 |
| 2017-11-11_00000070_1 | 00:13:40 | 00:25:22 | 00:00:03 | 00:36:59 | 01:21:41 | 03:33:06 | 21:50:44 | 62:51:22 |
| 2017-11-11_00000057_1 | 00:14:48 | 00:30:45 | 00:00:25 | 01:26:21 | 01:16:49 | 04:59:28 | 35:17:54 | 63:02:45 |
| 2017-11-11_00000054_1 | 00:31:22 | 00:30:20 | 00:00:02 | 00:37:58 | 01:11:22 | 03:40:04 | 23:21:28 | 62:55:19 |
| 2017-11-11_00000052_1 | 00:26:01 | 00:39:44 | 00:00:26 | 00:55:22 | 01:24:01 | 03:05:28 | 29:04:07 | 63:04:44 |
| 2017-11-11_00000036_1 | 00:25:28 | 00:37:11 | 03:00:25 | 00:36:49 | 00:53:28 | 02:22:54 | 22:19:39 | 63:01:11 |
| 2017-11-11_00000027_2 | 00:16:21 | 00:35:05 | 03:00:25 | 00:30:42 | 00:41:22 | 02:00:50 | 20:30:27 | 63:02:05 |
| 2017-11-11_00000026_2 | 00:16:54 | 00:35:51 | 03:00:25 | 00:31:31 | 00:34:55 | 01:56:37 | 20:32:03 | 62:57:51 |
| 2017-11-11_00000025_2 | 00:17:33 | 00:36:28 | 00:00:10 | 00:27:07 | 00:29:34 | 01:32:14 | 20:31:40 | 63:03:28 |
| 2017-11-11_00000024_2 | 00:18:21 | 00:37:04 | 03:00:25 | 00:24:44 | 00:23:21 | 02:06:50 | 21:07:32 | 63:04:04 |
| 2017-11-11_00000020_1 | 00:38:18 | 00:49:00 | 00:00:40 | 00:30:36 | 00:38:19 | 02:01:44 | 35:52:33 | 63:07:00 |
| 2017-11-11_00000016_2 | 00:02:25 | 00:34:04 | 03:00:25 | 00:04:37 | 00:14:25 | 00:25:45 | 18:10:42 | 63:06:03 |
| 2017-11-11_00000010_1 | 00:31:27 | 00:46:09 | 03:00:25 | 00:28:46 | 00:36:28 | 01:03:53 | 28:40:42 | 63:10:09 |
| 2017-11-11_00000006_1 | 00:05:44 | 00:40:21 | 03:00:25 | 00:24:46 | 00:26:45 | 01:42:59 | 26:41:26 | 63:09:20 |
| 2017-11-04_00000068_1 | 00:10:27 | 00:08:08 | 03:00:44 | 01:07:47 | 01:20:27 | 04:48:55 | 38:56:31 | 35:41:08 |
| 2017-11-04_00000055_2 | 00:26:01 | 00:09:58 | 03:00:44 | 01:03:35 | 01:07:02 | 04:12:42 | 32:04:06 | 36:01:57 |
| 2017-11-04_00000048_1 | 00:07:33 | 00:08:17 | 03:00:44 | 00:40:49 | 01:03:33 | 03:28:58 | 28:14:39 | 44:41:17 |
| 2017-11-04_00000042_1 | 00:09:01 | 00:12:46 | 03:00:44 | 00:42:24 | 01:08:02 | 03:37:31 | 31:58:08 | 26:22:45 |
| 2017-11-04_00000037_1 | 00:10:41 | 00:17:36 | 00:00:17 | 00:40:12 | 01:15:41 | 04:06:19 | 64:59:49 | 37:41:36 |
| 2017-11-04_00000032_1 | 00:17:09 | 00:23:03 | 03:00:44 | 00:52:42 | 01:39:10 | 03:10:48 | 61:59:18 | 24:53:02 |
| 2017-11-04_00000023_2 | 00:21:03 | 00:21:46 | 00:00:26 | 00:32:22 | 01:05:04 | 02:44:30 | 61:34:09 | 20:07:45 |
| 2017-11-04_00000020_2 | 00:22:33 | 00:23:18 | 00:00:00 | 00:28:56 | 00:54:34 | 02:28:03 | 63:57:48 | 16:53:17 |
| 2017-11-04_00000013_1 | 00:12:18 | 00:18:57 | 00:00:37 | 00:34:34 | 01:12:19 | 01:48:41 | 60:52:36 | 22:10:56 |
| 2017-11-04_00000009_1 | 00:03:34 | 00:17:05 | 03:00:44 | 00:23:40 | 00:48:35 | 00:59:49 | 59:50:56 | 20:27:04 |
| 2017-10-28_00000134_1 | 00:12:24 | 00:44:07 | 03:01:07 | 01:16:46 | 20:29:24 | 05:47:52 | 23:08:30 | 32:41:07 |
| 2017-10-28_00000126_1 | 00:17:48 | 00:53:45 | 00:00:29 | 01:40:25 | 20:56:48 | 06:30:31 | 41:52:53 | 38:20:45 |
| 2017-10-28_00000119_1 | 00:22:34 | 00:52:17 | 00:00:01 | 01:17:57 | 20:38:34 | 08:44:03 | 31:55:37 | 45:04:16 |
| 2017-10-28_00000109_1 | 00:28:08 | 01:00:03 | 00:00:45 | 01:38:41 | 21:08:08 | 05:28:48 | 42:47:12 | 38:30:02 |

|                       |          |          |          |          |          |          |          |          |
|-----------------------|----------|----------|----------|----------|----------|----------|----------|----------|
| 2017-10-28_00000099_2 | 00:05:52 | 00:45:37 | 03:01:07 | 01:00:16 | 20:17:53 | 05:39:22 | 31:45:57 | 38:20:37 |
| 2017-10-28_00000075_1 | 00:08:38 | 00:49:21 | 00:00:05 | 01:00:01 | 20:05:38 | 04:12:07 | 27:22:42 | 33:45:21 |
| 2017-10-28_00000074_1 | 00:14:09 | 00:51:07 | 03:01:07 | 01:22:47 | 20:28:10 | 05:30:53 | 37:29:15 | 37:37:06 |
| 2017-10-28_00000068_1 | 00:03:57 | 00:48:39 | 03:01:07 | 01:00:19 | 19:39:57 | 06:48:25 | 27:21:01 | 33:06:39 |
| 2017-10-28_00000067_1 | 00:06:28 | 00:48:26 | 00:00:09 | 00:58:05 | 19:31:28 | 03:44:12 | 27:22:35 | 37:06:25 |
| 2017-10-28_00000062_1 | 00:11:02 | 00:52:47 | 03:01:07 | 00:46:26 | 18:44:02 | 02:13:32 | 20:49:07 | 11:41:46 |
| 2017-10-28_00000061_1 | 00:11:34 | 00:56:32 | 00:00:15 | 00:46:11 | 18:44:34 | 02:39:17 | 29:31:37 | 20:05:31 |
| 2017-10-28_00000052_1 | 00:05:22 | 00:52:03 | 03:01:07 | 00:37:41 | 16:47:22 | 01:51:49 | 29:12:26 | 11:36:03 |
| 2017-10-28_00000044_1 | 00:17:01 | 01:07:54 | 00:00:37 | 01:01:33 | 15:52:01 | 03:55:40 | 37:22:05 | 45:39:54 |
| 2017-10-28_00000041_1 | 00:13:33 | 00:56:30 | 00:00:13 | 00:46:09 | 11:43:33 | 01:20:16 | 32:41:38 | 20:58:29 |
| 2017-10-28_00000029_1 | 00:08:20 | 00:57:04 | 03:01:07 | 00:15:42 | 09:27:21 | 00:24:50 | 27:27:27 | 08:42:04 |
| 2017-10-28_00000027_2 | 00:08:16 | 00:58:54 | 00:00:36 | 01:02:31 | 04:33:17 | 02:06:39 | 41:58:24 | 36:19:54 |
| 2017-10-28_00000021_1 | 00:23:08 | 01:15:50 | 00:00:33 | 01:18:29 | 02:16:08 | 04:48:36 | 47:20:12 | 36:56:50 |
| 2017-10-21_00000060_2 | 00:07:50 | 00:41:34 | 03:01:28 | 01:08:11 | 01:21:51 | 07:19:20 | 27:32:54 | 50:22:34 |
| 2017-10-21_00000059_1 | 00:31:28 | 00:48:25 | 00:00:02 | 01:10:58 | 01:16:28 | 06:58:04 | 27:20:32 | 49:17:25 |
| 2017-10-21_00000051_1 | 00:11:15 | 00:47:58 | 03:01:28 | 01:18:36 | 01:23:16 | 06:17:44 | 30:05:18 | 49:17:57 |
| 2017-10-21_00000036_1 | 00:16:57 | 00:49:43 | 00:00:26 | 01:07:22 | 01:05:58 | 05:31:28 | 26:57:03 | 49:15:42 |
| 2017-10-21_00000034_1 | 00:19:31 | 00:50:29 | 00:00:11 | 01:03:07 | 00:59:31 | 06:21:14 | 25:42:35 | 49:17:28 |
| 2017-10-21_00000032_1 | 00:06:46 | 00:45:45 | 03:01:28 | 00:51:23 | 00:51:47 | 04:33:31 | 16:31:49 | 32:44:44 |
| 2017-10-21_00000031_1 | 00:07:29 | 00:45:13 | 03:01:28 | 00:48:53 | 00:52:29 | 04:59:59 | 17:37:33 | 36:33:13 |
| 2017-10-21_00000029_1 | 00:04:16 | 00:45:59 | 03:01:28 | 00:45:37 | 00:48:17 | 04:25:44 | 12:34:20 | 32:13:59 |
| 2017-10-21_00000026_1 | 00:03:01 | 00:46:45 | 03:01:28 | 00:35:24 | 00:45:01 | 04:24:30 | 12:17:05 | 37:10:44 |
| 2017-10-21_00000023_1 | 00:04:52 | 00:50:31 | 00:00:14 | 00:42:09 | 00:51:53 | 03:56:17 | 24:02:55 | 30:16:31 |
| 2017-10-21_00000022_1 | 00:13:38 | 00:55:21 | 00:00:03 | 00:57:59 | 01:14:38 | 04:49:06 | 29:04:42 | 33:39:20 |
| 2017-10-21_00000020_1 | 00:08:25 | 00:52:09 | 03:01:28 | 00:26:46 | 00:35:25 | 02:20:54 | 19:25:29 | 19:37:08 |
| 2017-10-21_00000019_1 | 00:14:57 | 01:05:55 | 00:00:39 | 01:56:33 | 00:41:57 | 05:34:41 | 46:02:00 | 37:23:55 |
| 2017-10-21_00000015_1 | 00:20:41 | 01:07:26 | 00:00:09 | 01:04:04 | 01:32:41 | 04:08:11 | 33:36:44 | 34:45:25 |
| 2017-10-21_00000012_1 | 00:08:18 | 00:55:09 | 03:01:28 | 00:27:48 | 00:23:18 | 17:20:55 | 34:16:22 | 40:33:09 |
| 2017-10-21_00000006_1 | 00:34:06 | 01:03:49 | 03:01:28 | 00:21:26 | 00:39:07 | 01:48:35 | 31:07:12 | 26:16:49 |
| 2017-10-21_00000005_1 | 00:09:59 | 00:59:44 | 00:00:22 | 00:35:16 | 00:55:59 | 02:01:25 | 30:50:02 | 36:56:43 |
| 2017-10-21_00000002_1 | 00:06:05 | 00:56:49 | 00:00:10 | 00:18:06 | 00:18:05 | 02:04:19 | 24:28:13 | 16:57:46 |

**Supplementary Table 1** Raw data for "Response Time" column of Table 1. Target ID refers to the CAMEO target.

**Raw data – IDDT Easy**

| <b>Target</b>         | <b>SWISS-MODEL</b> | <b>HHpred B</b> | <b>NaiveBLAST</b> | <b>PRIMO</b> | <b>SPARKS-X</b> | <b>Raptor X</b> | <b>IntFOLD4-TS</b> | <b>Robetta</b> |
|-----------------------|--------------------|-----------------|-------------------|--------------|-----------------|-----------------|--------------------|----------------|
| 2018-01-13_00000066_2 | 82,45              | 79,97           | 71,63             | 83,57        | 75,85           | 81,44           | 81,7               | 82,47          |
| 2018-01-13_00000057_1 | 88,01              | 84,4            | 86,2              | 87,11        | 80,52           | 86,69           | 83,35              | 87,88          |
| 2018-01-13_00000055_1 | 80,56              | 81,37           | 81,04             | 83,76        | 79,62           | 82,33           | 83,93              | 84,61          |
| 2018-01-13_00000050_1 | 85,74              | 73,5            | 83,95             | 84,11        | 78,29           | 80,85           | 79,85              | 78,43          |
| 2018-01-13_00000043_1 | 91,47              | 77,1            | 87,71             | 89,21        | 71,78           | 84,51           | 88,85              | 88,01          |
| 2018-01-06_00000105_1 | 84,38              | 81,47           | 84,02             | 84,75        | 81,98           | 82,89           | 81,45              | 86,47          |
| 2017-12-23_00000086_1 | 81,4               | 78,34           | 79,34             | 79,98        | 80,24           | 80,81           | 81,76              | 80,07          |
| 2017-12-23_00000084_1 | 81,54              | 81,41           | 78,35             | 80,26        | 77,79           | 78,28           | 79,45              | 78,62          |
| 2017-12-23_00000066_1 | 85,05              | 81,07           | 83,28             | 83,76        | 80,72           | 83,04           | 83,81              | 84,5           |
| 2017-12-23_00000046_1 | 85,95              | 75,18           | 81,82             | 77,92        | 77,15           | 86,17           | 86,23              | 81,95          |
| 2017-12-16_00000045_2 | 83,19              | 82,35           | 82,41             | 81,58        | 76,74           | 84,35           | 78,37              | 84,34          |
| 2017-12-16_00000018_1 | 82,38              | 74,36           | 79,04             | 79,49        | 77,27           | 79,14           | 78,83              | 82,09          |
| 2017-12-09_00000057_1 | 93,08              | 90,1            | 86,97             | 91,59        | 89,98           | 88,93           | 91,01              | 88,66          |
| 2017-12-09_00000048_1 | 86,27              | 86,05           | 82,63             | 84,89        | 81,34           | 83,2            | 82,25              | 85,74          |
| 2017-12-09_00000037_1 | 87,23              | 80,22           | 84,35             | 85,77        | 83,45           | 80,16           | 84,14              | 83,71          |
| 2017-12-09_00000018_1 | 86,33              | 83,86           | 83,23             | 85,52        | 71,27           | 82,18           | 82,7               | 79,87          |
| 2017-12-09_00000015_1 | 88,96              | 86,11           | 89,89             | 89,81        | 89,67           | 86,04           | 89,24              | 86,61          |
| 2017-11-25_00000022_1 | 84,37              | 80,92           | 80,73             | 81,03        | 81,5            | 81,91           | 82,79              | 83,77          |
| 2017-11-25_00000020_1 | 84,28              | 84,81           | 83,17             | 83,23        | 83,5            | 84,31           | 82,64              | 89,25          |
| 2017-11-25_00000018_1 | 89,06              | 83,46           | 86,35             | 86,8         | 74,51           | 85,89           | 85,02              | 86,79          |
| 2017-11-18_00000009_1 | 89,34              | 85,35           | 80,87             | 81,49        | 86,5            | 79,85           | 80,68              | 83,79          |
| 2017-11-11_00000070_1 | 91,89              | 84,46           | 86,25             | 88,19        | 81,44           | 82,75           | 86,82              | 87,81          |
| 2017-11-11_00000027_2 | 83,13              | 82,07           | 81,11             | 81,57        | 71,79           | 81,24           | 77,96              | 85,35          |
| 2017-11-11_00000026_2 | 82,18              | 83,43           | 80,35             | 80,8         | 69,29           | 81,98           | 79,57              | 84,84          |
| 2017-11-11_00000025_2 | 83,02              | 75,36           | 81,46             | 81,65        | 74,77           | 77,96           | 78,6               | 86,31          |
| 2017-11-11_00000006_1 | 87,66              | 83,48           | 85,78             | 86,9         | 84,7            | 84,86           | 83,08              | 86,06          |
| 2017-11-04_00000068_1 | 81,91              | 81,07           | 78,04             | 78,62        | 75,26           | 81,02           | 80,92              | 85,52          |
| 2017-11-04_00000032_1 | 87,53              | 75,34           | 88,99             | 91,01        | 80,83           | 86,88           | 88,87              | 87,7           |
| 2017-10-28_00000052_1 | 77,2               | 76,85           | 78,24             | 79,6         | 75,33           | 77,7            | 78,12              | 80,53          |
| 2017-10-28_00000044_1 | 91,96              | 86,05           | 87,58             | 88,34        | 80,69           | 87,12           | 86,7               | 88,16          |
| 2017-10-28_00000041_1 | 95,31              | 88,74           | 91,06             | 92,79        | 89,81           | 86,67           | 90,46              | 84,73          |
| 2017-10-21_00000036_1 | 80,09              | 79,95           | 72,42             | 79,74        | 73,61           | 84,77           | 82,33              | 84,52          |



|                       |       |       |       |       |       |       |       |       |
|-----------------------|-------|-------|-------|-------|-------|-------|-------|-------|
| 2017-10-21_00000034_1 | 80,22 | 79,34 | 77,68 | 80,73 | 76,29 | 85,62 | 84,7  | 85,38 |
| 2017-10-21_00000022_1 | 95,15 | 90,47 | 90,63 | 92,65 | 92,34 | 90,72 | 91,93 | 92,04 |
| 2017-10-21_00000020_1 | 88,23 | 86,61 | 80,88 | 85,13 | 83,22 | 83,9  | 85,33 | 87,93 |
| 2017-10-21_00000015_1 | 89,91 | 85,65 | 87,54 | 88,61 | 87,43 | 82,98 | 87,97 | 87,6  |
| 2017-10-21_00000002_1 | 86    | 87,53 | 80,84 | 84,87 | 85,92 | 84,68 | 87,89 | 89,3  |

**Supplementary Table 2.** Raw data for "IDDT Easy" column of Table 1. Target ID refers to the CAMEO target. Please note that the data for the "IDDT Total" column of Table 1 is the union of "IDDT Easy", "IDDT Medium" and "IDDT Hard".

**Raw data – IDDT Medium**

| <b>Target</b>         | <b>SWISS-MODEL</b> | <b>HHpredB</b> | <b>NaiveB LAST</b> | <b>PRIMO</b> | <b>SPARKS-X</b> | <b>RaptorX</b> | <b>IntFOLD 4-TS</b> | <b>Robetta</b> |
|-----------------------|--------------------|----------------|--------------------|--------------|-----------------|----------------|---------------------|----------------|
| 2018-01-13_00000090_1 | 63,64              | 60,41          | 34,82              | 35,09        | 69,06           | 70,85          | 69,03               | 71,36          |
| 2018-01-13_00000062_1 | 64,87              | 59,13          | 53,98              | 50,65        | 52,2            | 61,61          | 59,16               | 63,62          |
| 2018-01-13_00000054_1 | 81,04              | 80,93          | 78,14              | 80,85        | 77,37           | 79,3           | 77,76               | 81,51          |
| 2018-01-13_00000045_2 | 69,7               | 67,44          | 68,1               | 67,42        | 59,78           | 65,51          | 59,31               | 66,83          |
| 2018-01-13_00000045_1 | 72,47              | 75,04          | 73,75              | 72,6         | 71,16           | 72,54          | 74,77               | 73,92          |
| 2018-01-13_00000040_1 | 79,69              | 75,2           | 68,68              | 69,09        | 68,51           | 68,25          | 70,94               | 75,15          |
| 2018-01-13_00000004_1 | 65,62              | 67,22          | 42,89              | 60,64        | 65,91           | 72,99          | 69,49               | 73,52          |
| 2018-01-06_00000107_1 | 90,07              | 63,21          | 83,8               | 56,54        | 62,85           | 86,45          | 83,72               | 73,28          |
| 2017-12-23_00000093_1 | 71,88              | 69,79          | 60,45              | 63,96        | 70,77           | 69,39          | 71,77               | 75,63          |
| 2017-12-23_00000090_1 | 70,31              | 70,79          | 68,15              | 69,78        | 68,2            | 70,31          | 68,43               | 71,38          |
| 2017-12-23_00000089_1 | 75,72              | 74,42          | 70,56              | 73,6         | 71,87           | 73,62          | 74,81               | 74,86          |
| 2017-12-23_00000041_1 | 72,84              | 80,86          | 73,54              | 74,06        | 66,16           | 76,96          | 77,27               | 85,07          |
| 2017-12-23_00000040_1 | 54,78              | 77,99          | 72,14              | 73,24        | 52,63           | 55,75          | 61,23               | 80,87          |
| 2017-12-23_00000039_1 | 58,44              | 65,84          | 55,77              | 57,28        | 56,14           | 65,75          | 66,48               | 70,32          |
| 2017-12-23_00000038_1 | 72,16              | 73,16          | 67,75              | 67,52        | 69,77           | 70,6           | 69,28               | 75,1           |
| 2017-12-23_00000021_2 | 69,17              | 68,18          | 63,07              | 65,5         | 65,55           | 68,71          | 68,41               | 73,07          |
| 2017-12-16_00000160_1 | 64,86              | 64,72          | 49,26              | 50,15        | 65,02           | 79,7           | 66,69               | 67,16          |
| 2017-12-16_00000124_1 | 79,9               | 71,27          | 77,32              | 79,02        | 73,29           | 79,02          | 80,41               | 82,75          |
| 2017-12-16_00000109_1 | 67,5               | 69,05          | 62,43              | 64,33        | 68,67           | 68,67          | 69,01               | 65,85          |
| 2017-12-16_00000096_1 | 66,06              | 67,17          | 63,91              | 67,47        | 68,69           | 74,37          | 67,53               | 74,98          |
| 2017-12-16_00000083_1 | 73,43              | 72,89          | 72,28              | 72,91        | 55,69           | 71,7           | 71,7                | 73,39          |
| 2017-12-16_00000061_1 | 63,42              | 59,25          | 56,71              | 58,52        | 59,68           | 60,92          | 62,22               | 44,62          |
| 2017-12-16_00000044_2 | 84,77              | 82,72          | 83,82              | 82,87        | 77,73           | 85,78          | 77,49               | 87,09          |
| 2017-12-16_00000009_1 | 74,09              | 74,26          | 72,64              | 75,56        | 71,06           | 74,41          | 72,32               | 79,44          |
| 2017-12-16_00000002_1 | 76,09              | 76,57          | 75,86              | 76,51        | 73,88           | 74,94          | 73,25               | 77,82          |
| 2017-12-09_00000061_1 | 52,52              | 57,9           | 50,49              | 52,95        | 51,54           | 59,26          | 56,26               | 61,69          |
| 2017-12-09_00000051_1 | 85                 | 83,2           | 81,47              | 84,36        | 73,12           | 83,35          | 83,93               | 86,68          |
| 2017-12-09_00000010_2 | 79,71              | 77,15          | 80,82              | 82,81        | 66,64           | 84,32          | 74,92               | 83,04          |
| 2017-12-09_00000008_2 | 68                 | 74,22          | 47,95              | 66,84        | 62,54           | 69,07          | 68,23               | 76,23          |
| 2017-12-09_00000005_1 | 65,66              | 78,15          | 76,91              | 81,88        | 67,56           | 72,56          | 77,58               | 79,71          |
| 2017-12-09_00000004_1 | 52,96              | 70,61          | 62,17              | 64,03        | 58,01           | 69,15          | 68,94               | 65,3           |
| 2017-12-02_00000122_1 | 86,43              | 82,75          | 75,82              | 80,46        | 66,26           | 81,02          | 85,48               | 84,83          |

|                       |       |       |       |       |       |       |       |       |
|-----------------------|-------|-------|-------|-------|-------|-------|-------|-------|
| 2017-12-02_00000116_1 | 75,66 | 85,32 | 90,47 | 93,33 | 88,35 | 87,32 | 91,02 | 80,74 |
| 2017-12-02_00000109_1 | 57,68 | 60,7  | 53,05 | 44    | 68,76 | 60,61 | 70,03 | 73,54 |
| 2017-12-02_00000106_1 | 84,74 | 81,79 | 82,56 | 83,83 | 79,18 | 85,22 | 82,47 | 78,87 |
| 2017-12-02_00000076_1 | 56,93 | 51,26 | 40,39 | 48,72 | 55,93 | 59,18 | 60,04 | 58,93 |
| 2017-12-02_00000070_1 | 79,72 | 76,9  | 75,85 | 71,95 | 69,45 | 73,39 | 77,89 | 78,11 |
| 2017-12-02_00000069_1 | 67,89 | 66,12 | 65,52 | 66,18 | 65,96 | 66,86 | 66,06 | 74,06 |
| 2017-12-02_00000058_1 | 69,28 | 62,96 | 80,62 | 64,2  | 67,16 | 82,23 | 68,29 | 85,14 |
| 2017-12-02_00000048_1 | 65,16 | 63,56 | 55,78 | 63,11 | 62,26 | 66,3  | 62,17 | 70,88 |
| 2017-12-02_00000030_1 | 67,67 | 61,19 | 81,9  | 65,73 | 66,11 | 84,82 | 66,15 | 87,34 |
| 2017-12-02_00000023_1 | 61,42 | 58,68 | 39,36 | 49,77 | 60,35 | 65,48 | 62,06 | 70,45 |
| 2017-11-25_00000061_1 | 62,25 | 54,16 | 56,87 | 60,07 | 47,95 | 63,04 | 59,04 | 58,24 |
| 2017-11-25_00000060_1 | 71,44 | 68,32 | 60,65 | 64,47 | 65,83 | 71,29 | 70,62 | 71,18 |
| 2017-11-25_00000056_1 | 54,28 | 56,16 | 51,01 | 52,19 | 52,9  | 57,98 | 58,11 | 62,41 |
| 2017-11-25_00000055_1 | 95,76 | 61,37 | 92,44 | 57,74 | 59,16 | 90,06 | 91,57 | 84,2  |
| 2017-11-25_00000050_1 | 69,76 | 67,4  | 59,98 | 61,6  | 66,86 | 64,87 | 68,32 | 72,59 |
| 2017-11-25_00000043_1 | 73,35 | 76,56 | 71,33 | 71,03 | 71,63 | 75,69 | 73,99 | 81,04 |
| 2017-11-25_00000041_1 | 70,84 | 69,65 | 69,98 | 69,75 | 69,28 | 64,06 | 70,18 | 70,01 |
| 2017-11-25_00000030_1 | 65,42 | 57,79 | 35,61 | 59,1  | 63,37 | 64,72 | 62,32 | 61,82 |
| 2017-11-25_00000017_1 | 49,3  | 61,86 | 40,56 | 63,29 | 57,24 | 66,05 | 62,55 | 62,51 |
| 2017-11-25_00000007_1 | 69,96 | 62,7  | 45,28 | 67,8  | 67,93 | 68,21 | 69,29 | 71,32 |
| 2017-11-18_00000073_1 | 72,16 | 75,96 | 22,04 | 28,01 | 67,02 | 70,16 | 77,98 | 75,14 |
| 2017-11-18_00000069_1 | 81,16 | 79,83 | 70,16 | 77,34 | 73,33 | 78,64 | 78,9  | 78,61 |
| 2017-11-18_00000068_1 | 74,8  | 71,81 | 72,21 | 71,79 | 73,39 | 73,73 | 76,99 | 78,92 |
| 2017-11-18_00000014_1 | 37,69 | 70,78 | 44,45 | 56,98 | 65,3  | 60,84 | 64,62 | 64,46 |
| 2017-11-11_00000092_1 | 63,64 | 78,4  | 70,78 | 79,59 | 71,17 | 78,01 | 75,99 | 80,1  |
| 2017-11-11_00000086_1 | 67,93 | 65,68 | 54,31 | 55,13 | 64,69 | 75,34 | 75,19 | 71,77 |
| 2017-11-11_00000057_1 | 55,45 | 54,46 | 43,16 | 47,59 | 51,45 | 55,1  | 51,71 | 55,8  |
| 2017-11-11_00000052_1 | 61,63 | 63,35 | 53,13 | 57,4  | 66,6  | 66,6  | 69,31 | 68    |
| 2017-11-11_00000036_1 | 83,01 | 78,72 | 80,81 | 82,07 | 77,81 | 79,72 | 79,55 | 81,91 |
| 2017-11-11_00000024_2 | 79,21 | 73,4  | 66,46 | 66,3  | 67,75 | 78,53 | 74,07 | 78,33 |
| 2017-11-11_00000016_2 | 50,9  | 68,3  | 50,79 | 59,94 | 71,71 | 77,13 | 73,62 | 67,35 |
| 2017-11-11_00000010_1 | 56,78 | 64,24 | 55,79 | 59,3  | 58,97 | 67,4  | 65,55 | 71,32 |
| 2017-11-04_00000055_2 | 76,77 | 76,77 | 78,15 | 78,01 | 72,25 | 78,57 | 78,15 | 78,77 |
| 2017-11-04_00000048_1 | 69,24 | 70,63 | 66,13 | 70,51 | 69,39 | 71,35 | 71,43 | 69,99 |

|                       |       |       |       |       |       |       |       |       |
|-----------------------|-------|-------|-------|-------|-------|-------|-------|-------|
| 2017-11-04_00000042_1 | 75,97 | 76,54 | 74,7  | 75    | 75,35 | 75,72 | 74,74 | 82,82 |
| 2017-11-04_00000037_1 | 72,86 | 72,37 | 70,83 | 62,86 | 72,25 | 74,78 | 73,65 | 74,26 |
| 2017-11-04_00000023_2 | 85,65 | 82,87 | 82,53 | 47    | 70,16 | 85,48 | 77,9  | 89,11 |
| 2017-11-04_00000020_2 | 86,3  | 80,81 | 81,67 | 45,83 | 68,65 | 84,16 | 80,94 | 86,48 |
| 2017-11-04_00000013_1 | 77,65 | 74,26 | 74,52 | 76,52 | 69,94 | 77,44 | 75,82 | 77,47 |
| 2017-11-04_00000009_1 | 67,49 | 42,19 | 65,78 | 18,11 | 21,61 | 66,89 | 66,32 | 65,61 |
| 2017-10-28_00000134_1 | 61,18 | 70,56 | 60,65 | 59,57 | 66,38 | 70,11 | 62,24 | 73,55 |
| 2017-10-28_00000126_1 | 84,49 | 69,52 | 81,82 | 84,37 | 46,57 | 83,39 | 83,86 | 82,44 |
| 2017-10-28_00000109_1 | 68,27 | 51,41 | 65,88 | 66,26 | 64,62 | 68,8  | 67,96 | 71,01 |
| 2017-10-28_00000099_2 | 90,35 | 80,96 | 86,66 | 90,04 | 52,17 | 66,25 | 39,89 | 61,44 |
| 2017-10-28_00000067_1 | 59,63 | 66,11 | 32,52 | 69,51 | 55,69 | 69,76 | 63,28 | 74,32 |
| 2017-10-28_00000062_1 | 78,51 | 82,01 | 79,29 | 77,22 | 74,85 | 81,04 | 81,68 | 82,08 |
| 2017-10-28_00000061_1 | 52,45 | 73,48 | 46,84 | 50,05 | 72,25 | 70,22 | 75,09 | 78,85 |
| 2017-10-28_00000029_1 | 78,54 | 77,92 | 76,96 | 78,46 | 72,45 | 79,71 | 80,57 | 80,06 |
| 2017-10-28_00000021_1 | 73,66 | 71,78 | 68,5  | 72,11 | 65,37 | 73,7  | 74,13 | 74,13 |
| 2017-10-21_00000059_1 | 70,06 | 67,59 | 35,65 | 36,51 | 69,12 | 69,57 | 73,07 | 75,45 |
| 2017-10-21_00000051_1 | 64,07 | 66,52 | 63,81 | 60,89 | 61,61 | 62,54 | 65,4  | 63,77 |
| 2017-10-21_00000032_1 | 66,98 | 65,27 | 66,62 | 66,85 | 65,66 | 70,02 | 66,91 | 79,41 |
| 2017-10-21_00000031_1 | 64,38 | 76,53 | 49,19 | 49,86 | 77,14 | 77,46 | 75,26 | 80,5  |
| 2017-10-21_00000029_1 | 70,36 | 72,63 | 68,2  | 68,88 | 72,65 | 70,34 | 74,76 | 75,33 |
| 2017-10-21_00000026_1 | 52,02 | 59,05 | 49,65 | 55,23 | 58,52 | 63,17 | 65,64 | 69,9  |
| 2017-10-21_00000023_1 | 50,75 | 51,76 | 51,88 | 51,83 | 51,16 | 52,69 | 52,54 | 52,96 |
| 2017-10-21_00000019_1 | 73,95 | 73,11 | 65,94 | 70,43 | 64,76 | 72,79 | 71,14 | 76,56 |
| 2017-10-21_00000006_1 | 76,91 | 77,54 | 74,48 | 77,02 | 68,81 | 77,51 | 73,71 | 82,19 |

**Supplementary Table 3.** Raw data for "IDDT Medium" column of Table 1. Target ID refers to the CAMEO target. Please note that the data for the "IDDT Total" column of Table 1 is the union of "IDDT Easy", "IDDT Medium" and "IDDT Hard".

**Raw data – IDDT Hard**

| <b>Target</b>         | <b>SWISS-MODEL</b> | <b>HHpredB</b> | <b>NaiveB LAST</b> | <b>PRIMO</b> | <b>SPARKS -X</b> | <b>RaptorX</b> | <b>IntFOLD 4-TS</b> | <b>Robetta</b> |
|-----------------------|--------------------|----------------|--------------------|--------------|------------------|----------------|---------------------|----------------|
| 2018-01-13_00000073_1 | 62,4               | 47,6           | 20,88              | 20,89        | 46,75            | 49,74          | 46,67               | 56,39          |
| 2018-01-13_00000068_1 | 60,42              | 50,51          | 22                 | 22,51        | 45,66            | 51,62          | 45,45               | 59,64          |
| 2018-01-13_00000047_1 | 5,82               | 18,22          | 2,03               | 3,05         | 39,18            | 41,73          | 34,68               | 41,86          |
| 2018-01-06_00000180_1 | 43,01              | 40,44          | 12,92              | 30,81        | 41,52            | 43,3           | 46,97               | 45,19          |
| 2018-01-06_00000178_1 | 46,78              | 45,09          | 13,01              | 31,85        | 45,14            | 45,09          | 48,35               | 49,09          |
| 2018-01-06_00000118_1 | 31,88              | 32,91          | 6,49               | 23,17        | 34,04            | 35,95          | 35,43               | 37,17          |
| 2018-01-06_00000114_1 | 42,36              | 42,32          | 19,89              | 14,51        | 41,69            | 49,71          | 45,25               | 55,56          |
| 2017-12-23_00000047_1 | 47,66              | 42,85          | 25,77              | 38,69        | 43,65            | 49,61          | 55,61               | 59,46          |
| 2017-12-23_00000027_1 | 44,43              | 65,83          | 25,46              | 34,65        | 51,45            | 65,67          | 59,78               | 64,52          |
| 2017-12-23_00000015_1 | 36,6               | 40,4           | 27,65              | 27,88        | 36,8             | 46,24          | 38,51               | 44,52          |
| 2017-12-23_00000001_1 | 3,6                | 33,14          | 73,37              | 13,31        | 15,85            | 76,37          | 72,28               | 76,99          |
| 2017-12-16_00000058_1 | 52,52              | 51,95          | 12,77              | 28,14        | 48,48            | 56,37          | 56,47               | 54,36          |
| 2017-12-16_00000000_1 | 9,83               | 34,67          | 4,02               | 16,05        | 20,56            | 34,22          | 34,71               | 22,07          |
| 2017-12-09_00000060_1 | 54,85              | 56,44          | 49,71              | 52,09        | 50,1             | 56,12          | 55,85               | 59,56          |
| 2017-12-09_00000058_1 | 27,43              | 50,15          | 24,54              | 25,74        | 54,66            | 57,91          | 51,93               | 59,04          |
| 2017-12-09_00000050_1 | 45,33              | 48,92          | 31,78              | 35,11        | 38,96            | 55,55          | 47,02               | 54,79          |
| 2017-12-09_00000046_1 | 75,7               | 49,76          | 73,01              | 9,22         | 46,77            | 54,08          | 68,99               | 75,84          |
| 2017-12-09_00000040_1 | 27,93              | 22,49          | 27,2               | 8,12         | 25,91            | 43,18          | 45,6                | 49,04          |
| 2017-12-09_00000021_1 | 40,01              | 45             | 15,64              | 19,83        | 50,06            | 55,07          | 50,68               | 43,61          |
| 2017-12-02_00000114_1 | 26,96              | 35,61          | 18,98              | 27,37        | 35,84            | 38,86          | 35,79               | 49,07          |
| 2017-12-02_00000102_1 | 32,72              | 49,57          | 42,85              | 47,02        | 49,08            | 53,87          | 49,79               | 58,09          |
| 2017-12-02_00000078_1 | 55,66              | 54,88          | 28,61              | 49,9         | 52,76            | 56,91          | 53,17               | 60,06          |
| 2017-12-02_00000071_1 | 51,54              | 54,37          | 15,69              | 47,72        | 56,68            | 56,7           | 55,43               | 62,81          |
| 2017-12-02_00000042_2 | 48,79              | 59,65          | 46,92              | 50,21        | 63               | 61,5           | 63,98               | 68,38          |
| 2017-12-02_00000042_1 | 58,21              | 54,57          | 46,73              | 57,94        | 59,19            | 63,56          | 61,37               | 66,47          |
| 2017-11-25_00000069_1 | 51,83              | 48,96          | 31,6               | 47,45        | 51,61            | 59,89          | 56,54               | 63,15          |
| 2017-11-25_00000066_1 | 43,2               | 23,72          | 22,42              | 4,3          | 28,86            | 49,61          | 48,52               | 55,23          |
| 2017-11-25_00000035_1 | 41,59              | 38,49          | 15,43              | 26,74        | 40,04            | 43,35          | 38,9                | 45,07          |
| 2017-11-25_00000021_1 | 23,05              | 45,39          | 22,25              | 22,16        | 43,87            | 36             | 59,59               | 47,28          |
| 2017-11-11_00000093_1 | 16,81              | 23,12          | 8,12               | 24,38        | 27,04            | 31,03          | 27,72               | 56,72          |
| 2017-11-11_00000077_1 | 39,93              | 35,23          | 14,54              | 24,21        | 33,95            | 28,83          | 48,31               | 44,5           |
| 2017-11-11_00000054_1 | 55,98              | 66,07          | 22,3               | 22,81        | 57,23            | 64,59          | 63,5                | 67,85          |

|                       |       |       |       |       |       |       |       |       |
|-----------------------|-------|-------|-------|-------|-------|-------|-------|-------|
| 2017-11-11_00000020_1 | 65,04 | 49,84 | 63,41 | 21,71 | 54,95 | 64,7  | 64,97 | 70,38 |
| 2017-10-28_00000119_1 | 26,5  | 31,36 | 11,55 | 20,56 | 34,41 | 38,43 | 35,78 | 40,25 |
| 2017-10-28_00000075_1 | 59,87 | 37,2  | 58,45 | 15,08 | 46,71 | 62,93 | 60,01 | 63,56 |
| 2017-10-28_00000074_1 | 36,57 | 46,4  | 1,87  | 15,03 | 42,16 | 46,46 | 51,13 | 49,86 |
| 2017-10-28_00000068_1 | 52,62 | 56,44 | 27,53 | 52,28 | 51,88 | 62,01 | 59,76 | 61,27 |
| 2017-10-28_00000027_2 | 39,45 | 42,56 | 33,44 | 41,32 | 39,73 | 43,46 | 40,19 | 43,13 |
| 2017-10-21_00000060_2 | 6,17  | 18,79 | 7,64  | 20,64 | 23,62 | 26,58 | 26,64 | 51,97 |
| 2017-10-21_00000012_1 | 29,1  | 34,25 | 1,25  | 17,14 | 32,1  | 42,33 | 37,75 | 36,12 |
| 2017-10-21_00000005_1 | 47,51 | 45,3  | 26,31 | 28,84 | 41,64 | 45,93 | 34,47 | 47,46 |

**Supplementary Table 4.** Raw data for "IDDT Hard" column of Table 1. Target ID refers to the CAMEO target. Please note that the data for the "IDDT Total" column of Table 1 is the union of "IDDT Easy", "IDDT Medium" and "IDDT Hard".

**Raw data – IDDT BS**

| <b>Target</b>         | <b>SWISS-MODEL</b> | <b>HHpred B</b> | <b>NaiveBLAST</b> | <b>PRIMO</b> | <b>SPARKS-X</b> | <b>Raptor X</b> | <b>IntFOLD4-TS</b> | <b>Robetta</b> |
|-----------------------|--------------------|-----------------|-------------------|--------------|-----------------|-----------------|--------------------|----------------|
| 2018-01-13_00000057_1 | 67,88              | 75,94           | 57,74             | 65,09        | 59,29           | 74,1            | 74,62              | 75,57          |
| 2018-01-13_00000055_1 | 100                | 96,92           | 93,57             | 91,49        | 98,1            | 97,37           | 98,19              | 89,13          |
| 2018-01-13_00000054_1 | 44,84              | 41,65           | 41,63             | 42,65        | 42,74           | 41,29           | 41,37              | 40,29          |
| 2018-01-13_00000043_1 | 60,7               | 67,09           | 62,86             | 60,61        | 62,24           | 65,67           | 67,63              | 63,75          |
| 2018-01-13_00000040_1 | 50,86              | 50,44           | 45,33             | 44,28        | 44,64           | 43,4            | 62,31              | 52,01          |
| 2018-01-13_00000004_1 | 68,79              | 71,2            | 61,2              | 56,51        | 73,49           | 71,59           | 71,19              | 68,23          |
| 2018-01-06_00000180_1 | 57,36              | 61,27           | 34,76             | 54,33        | 59,54           | 55,54           | 63,17              | 58,91          |
| 2018-01-06_00000178_1 | 66,47              | 72,9            | 41,33             | 53,71        | 68,97           | 71,84           | 71,68              | 63,61          |
| 2018-01-06_00000118_1 | 86,36              | 89,77           | 0                 | 19,6         | 81,39           | 78,84           | 45,74              | 69,46          |
| 2018-01-06_00000114_1 | 13,13              | 30,4            | 9,75              | 3,8          | 27,61           | 25,12           | 27,08              | 32,53          |
| 2018-01-06_00000107_1 | 53,99              | 48,1            | 50,47             | 45,26        | 43,29           | 49,81           | 48,6               | 47,08          |
| 2018-01-06_00000105_1 | 63,55              | 58,22           | 64,22             | 63,69        | 53,58           | 57,36           | 64,62              | 59,96          |
| 2017-12-23_00000046_1 | 73,3               | 70,93           | 73,78             | 68,33        | 72,49           | 76,22           | 70,02              | 70,35          |
| 2017-12-23_00000041_1 | 89,3               | 89,39           | 77,63             | 82,88        | 70,4            | 86,37           | 84,67              | 87,97          |
| 2017-12-23_00000039_1 | 76,35              | 72,84           | 68,1              | 84,37        | 76,52           | 74,26           | 87,44              | 63,53          |
| 2017-12-23_00000038_1 | 84,72              | 88,06           | 86,33             | 93,26        | 90,82           | 84,2            | 92,86              | 72,33          |
| 2017-12-16_00000124_1 | 87,45              | 77,98           | 86,1              | 85,47        | 59,53           | 78,36           | 89,19              | 84,74          |
| 2017-12-16_00000109_1 | 91,55              | 75,98           | 77,41             | 78,54        | 62,15           | 73,73           | 67,97              | 55,01          |
| 2017-12-16_00000096_1 | 69,9               | 84,47           | 78,45             | 70,46        | 79,29           | 85,78           | 72,3               | 81,65          |
| 2017-12-16_00000061_1 | 69,97              | 69,4            | 63,87             | 68,26        | 63,08           | 57,11           | 64,12              | 64,48          |
| 2017-12-16_00000009_1 | 75,18              | 86,83           | 76,95             | 76,26        | 70,66           | 74,88           | 69,75              | 78,68          |
| 2017-12-16_00000000_1 | 4,47               | 46,86           | 4,32              | 39,46        | 15,29           | 17,95           | 24,8               | 24,29          |
| 2017-12-09_00000058_1 | 58,94              | 69,06           | 0                 | 0            | 69,36           | 71,16           | 66,27              | 68,84          |
| 2017-12-09_00000057_1 | 87,14              | 86,5            | 66,59             | 87,38        | 84,45           | 87,53           | 92,07              | 82,64          |
| 2017-12-09_00000050_1 | 37,76              | 62,81           | 32,94             | 42,41        | 57,74           | 50,32           | 50,85              | 57,66          |
| 2017-12-09_00000037_1 | 78,28              | 87,19           | 90,27             | 91,39        | 91,29           | 88,01           | 91,8               | 75,51          |
| 2017-12-09_00000018_1 | 76,95              | 74,7            | 80,22             | 77,01        | 72,31           | 75,96           | 75,19              | 74,14          |
| 2017-12-09_00000015_1 | 89,57              | 78,75           | 88,81             | 90,62        | 92,62           | 79,67           | 91,64              | 79,09          |
| 2017-12-09_00000004_1 | 21,74              | 25,47           | 21,6              | 25           | 27,17           | 22,73           | 24,29              | 21,06          |
| 2017-12-02_00000116_1 | 97,53              | 71,88           | 100               | 100          | 44,66           | 83,59           | 100                | 48,18          |
| 2017-12-02_00000114_1 | 25,85              | 26,62           | 12,24             | 15,88        | 22,19           | 24,94           | 23,2               | 28,24          |
| 2017-12-02_00000102_1 | 37,34              | 68,64           | 58,55             | 57,98        | 69,91           | 63,58           | 67,77              | 67,06          |

|                       |       |       |       |       |       |       |       |       |
|-----------------------|-------|-------|-------|-------|-------|-------|-------|-------|
| 2017-12-02_00000070_1 | 89,5  | 90,4  | 93,03 | 80,64 | 80,42 | 68,44 | 92,59 | 77,52 |
| 2017-12-02_00000069_1 | 73,84 | 71,88 | 60,63 | 68,17 | 66,75 | 74,77 | 63,72 | 81,83 |
| 2017-12-02_00000058_1 | 94,93 | 87,87 | 90,61 | 94,64 | 93,6  | 94,01 | 95,23 | 88,05 |
| 2017-12-02_00000048_1 | 76,25 | 80,36 | 76,01 | 78,07 | 76,73 | 76,23 | 76,5  | 75,12 |
| 2017-12-02_00000030_1 | 93,62 | 87,72 | 96,13 | 87,67 | 91,6  | 89,7  | 90,18 | 91,97 |
| 2017-12-02_00000023_1 | 73,36 | 72,37 | 46,12 | 73,65 | 68,17 | 72,79 | 74,95 | 71,91 |
| 2017-11-25_00000061_1 | 93,88 | 96,92 | 89,08 | 96,98 | 98,12 | 89,01 | 99,26 | 70,77 |
| 2017-11-25_00000056_1 | 81,34 | 72,09 | 69,8  | 68,65 | 75,31 | 78,01 | 78,92 | 82,28 |
| 2017-11-25_00000043_1 | 50,86 | 51,28 | 38,13 | 38,96 | 51,56 | 42,31 | 62,57 | 63,95 |
| 2017-11-25_00000035_1 | 46,8  | 49,41 | 14,49 | 34,97 | 44,48 | 51,7  | 49,9  | 57,53 |
| 2017-11-25_00000030_1 | 75,91 | 76,1  | 66,12 | 68,56 | 65,77 | 74,95 | 62,42 | 39,67 |
| 2017-11-25_00000022_1 | 81,53 | 78,17 | 78,99 | 80,74 | 78,56 | 77,5  | 74,56 | 81,11 |
| 2017-11-25_00000007_1 | 96,02 | 89,75 | 92,6  | 90,8  | 95,06 | 86,32 | 88,9  | 80,95 |
| 2017-11-18_00000009_1 | 99,5  | 95,68 | 97,26 | 96,29 | 97,17 | 85,99 | 94,31 | 85,63 |
| 2017-11-11_00000077_1 | 52,7  | 37,9  | 14,56 | 26,85 | 29,73 | 25,61 | 43,58 | 38,61 |
| 2017-11-11_00000070_1 | 99,25 | 93,95 | 95,39 | 97,72 | 99,08 | 91,36 | 98,07 | 94,91 |
| 2017-11-11_00000057_1 | 91,05 | 93,54 | 93,25 | 93,27 | 95,7  | 94,56 | 93,65 | 75,46 |
| 2017-11-11_00000052_1 | 54,05 | 60,97 | 56,81 | 56,79 | 59,2  | 55,64 | 62,18 | 58,95 |
| 2017-11-11_00000020_1 | 13,25 | 27,35 | 13,78 | 0     | 19,38 | 15,22 | 14,27 | 17,1  |
| 2017-11-11_00000010_1 | 50,63 | 61,63 | 52,27 | 58,65 | 59,37 | 62,98 | 60,99 | 63,56 |
| 2017-11-11_00000006_1 | 91,02 | 87,93 | 88,87 | 91,28 | 90,4  | 84,56 | 92,12 | 87,36 |
| 2017-11-04_00000068_1 | 82,23 | 89,77 | 81,5  | 89,54 | 76,64 | 82,66 | 85,7  | 86,03 |
| 2017-11-04_00000048_1 | 66,33 | 63,55 | 62,41 | 66,39 | 65,78 | 59,47 | 68,1  | 54,12 |
| 2017-11-04_00000042_1 | 81,91 | 81,57 | 75,43 | 74,58 | 75,53 | 77,66 | 76,43 | 88,33 |
| 2017-11-04_00000032_1 | 90,08 | 86,66 | 85,71 | 94,81 | 77,27 | 83,7  | 91,81 | 81,69 |
| 2017-10-28_00000119_1 | 26,57 | 46    | 23,37 | 27,75 | 31,35 | 31,43 | 34,54 | 30,28 |
| 2017-10-28_00000075_1 | 97,6  | 64,41 | 97,36 | 92,95 | 71,07 | 89,63 | 97,06 | 83,21 |
| 2017-10-28_00000068_1 | 60,91 | 66,59 | 60,79 | 62,5  | 69,48 | 79,33 | 76,63 | 73,53 |
| 2017-10-28_00000061_1 | 46,71 | 58,03 | 36,22 | 47,99 | 51,93 | 48,55 | 61,21 | 59,98 |
| 2017-10-28_00000052_1 | 95,82 | 81,38 | 94,05 | 94,9  | 87,37 | 77,64 | 60,54 | 81,97 |
| 2017-10-28_00000041_1 | 81,41 | 78,58 | 82,92 | 84,05 | 83,27 | 73,93 | 84    | 71,31 |
| 2017-10-21_00000051_1 | 80,73 | 72,95 | 73,49 | 68,9  | 69,87 | 70,5  | 75,14 | 63,23 |
| 2017-10-21_00000034_1 | 54,67 | 48,81 | 53,99 | 57,34 | 49,05 | 49,32 | 55,08 | 51,38 |
| 2017-10-21_00000022_1 | 99,5  | 92,07 | 89,78 | 97,95 | 90,75 | 91,33 | 95,67 | 95,24 |



|                       |       |       |       |       |       |       |       |       |
|-----------------------|-------|-------|-------|-------|-------|-------|-------|-------|
| 2017-10-21_00000019_1 | 96,33 | 83    | 92,26 | 94,3  | 57,62 | 86,39 | 95,87 | 72,3  |
| 2017-10-21_00000015_1 | 93,93 | 90,25 | 91,58 | 92,36 | 89,69 | 83,26 | 91,46 | 86,96 |
| 2017-10-21_00000006_1 | 89,1  | 86,52 | 75,81 | 78,39 | 85,81 | 85,82 | 83,39 | 86,48 |

**Supplementary Table 5.** Raw data for "IDDT BS" column of Table 1. Target ID refers to the CAMEO target.

**Raw data – QS-Score**

| <b>Target</b>         | <b>SWISS-MODEL</b> | <b>Robetta</b> |
|-----------------------|--------------------|----------------|
| 2018-01-13_00000068_1 | 31,18              | 29,94          |
| 2018-01-13_00000054_1 | 59,37              | 56             |
| 2018-01-13_00000043_1 | 19,47              | 19,33          |
| 2018-01-13_00000004_1 | 48,33              | 53,84          |
| 2018-01-06_00000155_1 | 9,22               | 0              |
| 2018-01-06_00000150_1 | 97,81              | 96,39          |
| 2018-01-06_00000107_1 | 84,98              | 72,25          |
| 2018-01-06_00000105_1 | 94,77              | 81,89          |
| 2018-01-06_00000025_1 | 31,54              | 26,41          |
| 2018-01-06_00000014_1 | 89,21              | 94,13          |
| 2017-12-30_00000075_1 | 75,41              | 68,74          |
| 2017-12-30_00000014_1 | 54,31              | 51,38          |
| 2017-12-23_00000046_1 | 94,9               | 93,71          |
| 2017-12-16_00000096_1 | 30,09              | 0,19           |
| 2017-12-16_00000058_1 | 49,26              | 48,23          |
| 2017-12-09_00000060_1 | 54                 | 50,69          |
| 2017-12-09_00000051_1 | 91,84              | 81,12          |
| 2017-12-09_00000048_1 | 71,33              | 68,2           |
| 2017-12-02_00000102_1 | 13,61              | 24,89          |
| 2017-12-02_00000070_1 | 70,21              | 8,27           |
| 2017-11-18_00000069_1 | 74,32              | 69,04          |
| 2017-11-18_00000025_1 | 81,14              | 72,24          |
| 2017-11-18_00000015_1 | 34,46              | 36,67          |
| 2017-11-18_00000009_1 | 93,4               | 66,25          |
| 2017-11-11_00000052_1 | 47,58              | 68,33          |
| 2017-11-11_00000010_1 | 63,99              | 70,22          |
| 2017-11-04_00000053_1 | 89,23              | 92,03          |
| 2017-11-04_00000042_1 | 95,39              | 75,31          |
| 2017-10-28_00000041_1 | 97,51              | 93,22          |
| 2017-10-21_00000020_1 | 86,03              | 96,53          |
| 2017-10-21_00000015_1 | 94,02              | 91,62          |
| 2017-10-21_00000006_1 | 18,54              | 69,34          |

**Supplementary Table 6.** Raw data for "QS-Score" column of Table 1. Target ID refers to the CAMEO target.

**Raw data – Model Confidence**

| <b>Target</b>         | <b>SWISS-MODEL</b> | <b>HHpredB</b> | <b>NaiveB LAST</b> | <b>PRIMO</b> | <b>SPARKS-X</b> | <b>RaptorX</b> | <b>IntFOLD 4-TS</b> | <b>Robetta</b> |
|-----------------------|--------------------|----------------|--------------------|--------------|-----------------|----------------|---------------------|----------------|
| 2018-01-13_00000090_1 | 0,78               | 0,82           | 0,62               | 0,6          | 0,51            | 0,59           | 0,82                | 0,84           |
| 2018-01-13_00000073_1 | 0,82               | 0,74           | 0,56               | 0,51         | 0,55            | 0,52           | 0,82                | 0,61           |
| 2018-01-13_00000068_1 | 0,85               | 0,76           | 0,52               | 0,57         | 0,55            | 0,56           | 0,87                | 0,89           |
| 2018-01-13_00000066_2 | 0,95               | 0,95           | 0,75               | 0,74         | 0,51            | 0,88           | 0,99                | 0,99           |
| 2018-01-13_00000062_1 | 0,84               | 0,53           | 0,51               | 0,52         | 0,51            | 0,68           | 0,82                | 0,69           |
| 2018-01-13_00000057_1 | 1                  | 0,77           | 0,89               | 0,63         | 0,53            | 0,66           | 0,62                | 0,98           |
| 2018-01-13_00000055_1 | 0,96               | 0,84           | 0,54               | 0,52         | 0,56            | 0,54           | 0,94                | 0,98           |
| 2018-01-13_00000054_1 | 0,92               | 0,5            | 0,63               | 0,72         | 0,57            | 0,74           | 0,65                | 0,93           |
| 2018-01-13_00000050_1 | 0,97               | 0,64           | 0,74               | 0,66         | 0,51            | 0,6            | 0,88                | 0,96           |
| 2018-01-13_00000047_1 | -                  | -              | -                  | -            | 0,5             | 0,73           | -                   | 0,64           |
| 2018-01-13_00000045_2 | 0,94               | 0,68           | 0,71               | 0,66         | 0,5             | 0,57           | 0,92                | 0,91           |
| 2018-01-13_00000045_1 | 0,87               | 0,79           | 0,72               | 0,63         | 0,51            | 0,65           | 0,86                | 0,76           |
| 2018-01-13_00000043_1 | 0,99               | 0,76           | 0,78               | 0,9          | 0,57            | 0,52           | 0,96                | 1              |
| 2018-01-13_00000040_1 | 0,93               | 0,58           | 0,54               | 0,51         | 0,5             | 0,56           | 0,75                | 0,66           |
| 2018-01-13_00000004_1 | 0,9                | 0,79           | 0,53               | 0,65         | 0,52            | 0,72           | 0,84                | 0,89           |
| 2018-01-06_00000180_1 | 0,95               | 0,87           | 0,7                | 0,66         | 0,5             | 0,57           | 0,9                 | 0,5            |
| 2018-01-06_00000178_1 | 0,91               | 0,91           | 0,7                | 0,64         | 0,5             | 0,57           | 0,92                | 0,5            |
| 2018-01-06_00000118_1 | 0,58               | 0,96           | -                  | 0,59         | -               | 0,64           | 0,99                | 0,96           |
| 2018-01-06_00000114_1 | 0,83               | 0,75           | 0,52               | -            | 0,5             | 0,63           | 0,77                | 0,72           |
| 2018-01-06_00000107_1 | 0,94               | 0,72           | 0,7                | 0,68         | 0,5             | 0,72           | 0,64                | 0,77           |
| 2018-01-06_00000105_1 | 0,9                | 0,76           | 0,68               | 0,75         | 0,5             | 0,78           | 0,86                | 0,72           |
| 2017-12-23_00000093_1 | 0,94               | 0,74           | 0,65               | 0,69         | 0,51            | 0,63           | 0,89                | 0,88           |
| 2017-12-23_00000090_1 | 0,8                | 0,58           | 0,74               | 0,65         | 0,5             | 0,67           | 0,75                | 0,71           |
| 2017-12-23_00000089_1 | 0,82               | 0,83           | 0,64               | 0,56         | 0,75            | 0,76           | 0,92                | 0,61           |
| 2017-12-23_00000086_1 | 0,94               | 0,65           | 0,75               | 0,73         | 0,51            | 0,7            | 0,94                | 0,87           |
| 2017-12-23_00000084_1 | 0,99               | 0,96           | 0,71               | 0,67         | 0,53            | 0,57           | 0,97                | 0,95           |
| 2017-12-23_00000066_1 | 0,83               | 0,73           | 0,58               | 0,5          | 0,5             | 0,62           | 0,91                | 0,8            |
| 2017-12-23_00000047_1 | 0,83               | 0,66           | 0,52               | 0,71         | 0,52            | 0,57           | 0,7                 | 0,64           |
| 2017-12-23_00000046_1 | 0,78               | 0,72           | 0,7                | 0,69         | 0,59            | 0,77           | 0,88                | 0,83           |
| 2017-12-23_00000041_1 | 0,87               | 0,73           | 0,55               | 0,69         | 0,54            | 0,69           | 0,83                | 0,86           |
| 2017-12-23_00000040_1 | 0,93               | 0,91           | 0,86               | 0,76         | 0,52            | 0,6            | 0,89                | 0,91           |
| 2017-12-23_00000039_1 | 0,88               | 0,74           | 0,62               | 0,64         | 0,51            | 0,68           | 0,88                | 0,85           |

|                       |      |      |      |      |      |      |      |      |
|-----------------------|------|------|------|------|------|------|------|------|
| 2017-12-23_00000038_1 | 0,92 | 0,86 | 0,71 | 0,74 | 0,51 | 0,75 | 0,9  | 0,96 |
| 2017-12-23_00000027_1 | 0,82 | 0,88 | -    | 0,86 | 0,51 | 0,64 | 0,77 | 0,86 |
| 2017-12-23_00000021_2 | 0,91 | 0,84 | 0,66 | 0,65 | 0,53 | 0,69 | 0,92 | 0,87 |
| 2017-12-23_00000015_1 | 0,66 | 0,91 | 0,7  | -    | -    | 0,67 | 0,83 | 0,88 |
| 2017-12-23_00000001_1 | -    | 0,81 | 0,64 | -    | -    | 0,75 | 0,77 | 0,73 |
| 2017-12-16_00000160_1 | 0,95 | 0,75 | 0,53 | 0,64 | 0,5  | 0,71 | 0,74 | 0,81 |
| 2017-12-16_00000124_1 | 0,89 | 0,88 | 0,56 | 0,57 | 0,5  | 0,65 | 0,93 | 0,94 |
| 2017-12-16_00000109_1 | 0,9  | 0,83 | 0,69 | 0,68 | 0,5  | 0,7  | 0,86 | 0,5  |
| 2017-12-16_00000096_1 | 0,99 | 0,81 | 0,7  | 0,63 | 0,51 | 0,64 | 0,88 | 0,88 |
| 2017-12-16_00000083_1 | 0,85 | 0,66 | 0,55 | 0,51 | 0,5  | 0,54 | 0,93 | 0,74 |
| 2017-12-16_00000061_1 | 0,88 | 0,88 | 0,71 | 0,71 | 0,5  | 0,67 | 0,91 | 0,85 |
| 2017-12-16_00000058_1 | 0,9  | 0,91 | 0,65 | 0,69 | 0,51 | 0,69 | 0,93 | 0,85 |
| 2017-12-16_00000045_2 | 0,94 | 1    | 0,96 | 0,74 | 0,75 | 0,57 | 0,97 | 0,99 |
| 2017-12-16_00000044_2 | 0,95 | 0,97 | 0,89 | 0,88 | 0,66 | 0,64 | 0,95 | 0,97 |
| 2017-12-16_00000018_1 | 0,87 | 0,62 | 0,62 | 0,64 | 0,5  | 0,72 | 0,92 | 0,85 |
| 2017-12-16_00000009_1 | 0,85 | 0,7  | 0,65 | 0,66 | 0,5  | 0,6  | 0,74 | 0,74 |
| 2017-12-16_00000002_1 | 0,85 | 0,53 | 0,65 | 0,55 | 0,57 | 0,66 | 0,6  | 0,52 |
| 2017-12-16_00000000_1 | -    | 0,9  | -    | -    | 0,5  | 0,7  | 0,86 | 0,58 |
| 2017-12-09_00000061_1 | 0,66 | 0,78 | 0,56 | 0,58 | 0,52 | 0,61 | 0,72 | 0,69 |
| 2017-12-09_00000060_1 | 0,77 | 0,8  | 0,54 | 0,64 | 0,52 | 0,63 | 0,69 | 0,69 |
| 2017-12-09_00000058_1 | 0,83 | 0,65 | 0,58 | 0,51 | 0,51 | 0,61 | 0,7  | 0,81 |
| 2017-12-09_00000057_1 | 0,87 | 0,86 | 0,72 | 0,58 | 0,6  | 0,6  | 0,51 | 0,87 |
| 2017-12-09_00000051_1 | 0,99 | 0,79 | 0,55 | 0,97 | 0,52 | 0,68 | 0,82 | 0,77 |
| 2017-12-09_00000050_1 | 0,92 | 0,84 | 0,68 | 0,54 | 0,5  | 0,75 | 0,89 | 0,93 |
| 2017-12-09_00000048_1 | 0,67 | 0,75 | 0,71 | 0,65 | 0,54 | 0,58 | 0,53 | 0,89 |
| 2017-12-09_00000046_1 | 0,83 | 0,8  | 0,6  | -    | 0,51 | 0,63 | 0,77 | 0,69 |
| 2017-12-09_00000040_1 | 0,51 | 0,96 | 0,55 | -    | 0,5  | 0,59 | 0,99 | 0,97 |
| 2017-12-09_00000037_1 | 0,99 | 0,8  | 0,93 | 0,85 | 0,54 | 0,58 | 1    | 0,94 |
| 2017-12-09_00000021_1 | 0,76 | 0,65 | -    | -    | 0,54 | 0,71 | 0,89 | 0,71 |
| 2017-12-09_00000018_1 | 0,96 | 0,83 | 0,61 | 0,8  | 0,51 | 0,63 | 0,87 | 0,83 |
| 2017-12-09_00000015_1 | 0,99 | 0,78 | 0,84 | 0,88 | 0,5  | 0,75 | 0,99 | 0,97 |
| 2017-12-09_00000010_2 | 0,98 | 0,81 | 0,72 | 0,82 | 0,5  | 0,89 | 0,92 | 0,91 |
| 2017-12-09_00000008_2 | 0,94 | 0,9  | 0,61 | 0,64 | 0,54 | 0,61 | 0,91 | 0,94 |
| 2017-12-09_00000005_1 | 0,85 | 0,74 | 0,82 | 0,53 | 0,56 | 0,5  | 0,74 | 0,95 |
| 2017-12-09_00000004_1 | 0,76 | 0,98 | 0,53 | 0,51 | 0,51 | 0,57 | 0,96 | 0,95 |

|                       |      |      |      |      |      |      |      |      |
|-----------------------|------|------|------|------|------|------|------|------|
| 2017-12-02_00000122_1 | 1    | 0,97 | 0,53 | 0,58 | 0,52 | 0,56 | 0,99 | 1    |
| 2017-12-02_00000116_1 | 0,95 | 0,91 | 0,74 | 0,61 | 0,57 | 0,63 | 1    | 0,89 |
| 2017-12-02_00000114_1 | 0,89 | 0,88 | 0,58 | 0,66 | 0,5  | 0,69 | 0,92 | 0,54 |
| 2017-12-02_00000109_1 | 0,79 | 0,61 | 0,68 | 0,56 | 0,72 | 0,65 | 0,74 | 0,66 |
| 2017-12-02_00000106_1 | 0,93 | 0,85 | 0,88 | 0,82 | 0,52 | 0,67 | 0,68 | 0,85 |
| 2017-12-02_00000102_1 | 0,82 | 0,8  | 0,57 | 0,72 | 0,52 | 0,73 | 0,89 | 0,67 |
| 2017-12-02_00000078_1 | 0,82 | 0,8  | -    | 0,72 | 0,55 | 0,63 | 0,88 | 0,85 |
| 2017-12-02_00000076_1 | 0,84 | 0,78 | 0,79 | 0,64 | 0,54 | 0,61 | 0,88 | 0,88 |
| 2017-12-02_00000071_1 | 0,93 | 0,84 | 0,89 | 0,69 | 0,52 | 0,73 | 0,88 | 0,9  |
| 2017-12-02_00000070_1 | 0,96 | 0,84 | 0,73 | 0,77 | 0,5  | 0,66 | 0,75 | 0,74 |
| 2017-12-02_00000069_1 | 0,79 | 0,64 | 0,63 | 0,56 | 0,51 | 0,56 | 0,73 | 0,78 |
| 2017-12-02_00000058_1 | 0,85 | 0,79 | 0,75 | 0,67 | 0,53 | 0,52 | 0,85 | 0,99 |
| 2017-12-02_00000048_1 | 0,81 | 0,67 | 0,59 | 0,67 | 0,5  | 0,63 | 0,76 | 0,71 |
| 2017-12-02_00000042_2 | 0,73 | 0,62 | 0,72 | 0,67 | 0,5  | 0,61 | 0,69 | 0,66 |
| 2017-12-02_00000042_1 | 0,89 | 0,74 | 0,61 | 0,72 | 0,53 | 0,62 | 0,91 | 0,88 |
| 2017-12-02_00000030_1 | 0,88 | 0,76 | 0,91 | 0,6  | 0,5  | 0,62 | 0,85 | 1    |
| 2017-12-02_00000023_1 | 0,84 | 0,76 | 0,59 | 0,68 | 0,5  | 0,66 | 0,82 | 0,84 |
| 2017-11-25_00000069_1 | 0,83 | 0,64 | 0,67 | 0,64 | 0,5  | 0,75 | 0,8  | 0,78 |
| 2017-11-25_00000066_1 | 0,85 | 0,66 | 0,77 | -    | 0,5  | 0,69 | 0,83 | 0,85 |
| 2017-11-25_00000061_1 | 0,95 | 0,84 | 0,69 | 0,71 | 0,52 | 0,69 | 0,91 | 0,87 |
| 2017-11-25_00000060_1 | 0,9  | 0,88 | 0,67 | 0,75 | 0,52 | 0,64 | 0,96 | 0,94 |
| 2017-11-25_00000056_1 | 0,93 | 0,87 | 0,67 | 0,69 | 0,52 | 0,69 | 0,88 | 0,91 |
| 2017-11-25_00000055_1 | -    | 0,8  | 0,95 | 0,69 | 0,5  | 0,56 | 0,61 | 0,89 |
| 2017-11-25_00000050_1 | 0,88 | 0,82 | 0,7  | 0,65 | 0,5  | 0,69 | 0,87 | 0,83 |
| 2017-11-25_00000043_1 | 0,95 | 0,55 | 0,65 | 0,63 | 0,51 | 0,69 | 0,82 | 0,66 |
| 2017-11-25_00000041_1 | 0,82 | 0,61 | 0,55 | 0,57 | 0,5  | 0,59 | 0,81 | 0,76 |
| 2017-11-25_00000035_1 | 0,89 | 0,85 | 0,73 | 0,78 | 0,5  | 0,66 | 0,86 | 0,89 |
| 2017-11-25_00000030_1 | 0,76 | 0,71 | 0,61 | 0,62 | 0,5  | 0,67 | 0,68 | 0,75 |
| 2017-11-25_00000022_1 | 0,94 | 0,83 | 0,67 | 0,67 | 0,5  | 0,64 | 0,83 | 0,94 |
| 2017-11-25_00000021_1 | 0,5  | 0,64 | 0,6  | 0,55 | 0,5  | 0,58 | 0,68 | 0,58 |
| 2017-11-25_00000020_1 | 0,93 | 0,63 | 0,78 | 0,69 | 0,51 | 0,74 | 0,74 | 0,7  |
| 2017-11-25_00000018_1 | 0,97 | 0,61 | 0,72 | 0,73 | 0,5  | 0,66 | 0,68 | 0,97 |
| 2017-11-25_00000017_1 | 0,72 | 0,73 | 0,62 | 0,65 | 0,64 | 0,5  | 0,88 | 0,84 |
| 2017-11-25_00000007_1 | 0,86 | 0,76 | 0,72 | 0,67 | 0,5  | 0,65 | 0,78 | 0,86 |
| 2017-11-18_00000073_1 | 0,95 | 0,9  | 0,69 | 0,64 | 0,52 | 0,58 | 0,96 | 0,93 |

|                       |      |      |      |      |      |      |      |      |
|-----------------------|------|------|------|------|------|------|------|------|
| 2017-11-18_00000069_1 | 1    | 0,67 | 0,68 | 0,92 | 0,53 | 0,65 | -    | 0,67 |
| 2017-11-18_00000068_1 | 0,84 | 0,83 | 0,62 | 0,62 | 0,55 | 0,62 | 0,95 | 0,91 |
| 2017-11-18_00000014_1 | 0,95 | 0,64 | 0,6  | 0,66 | 0,5  | 0,71 | 0,65 | 0,57 |
| 2017-11-18_00000009_1 | 0,87 | 0,8  | 0,61 | 0,59 | 0,56 | 0,56 | 0,85 | 0,6  |
| 2017-11-11_00000093_1 | -    | -    | -    | -    | -    | -    | -    | 0,54 |
| 2017-11-11_00000092_1 | 0,81 | 1    | 0,95 | 0,7  | 0,5  | 0,62 | 1    | 0,79 |
| 2017-11-11_00000086_1 | 0,74 | 0,71 | 0,58 | 0,52 | 0,5  | 0,63 | 0,85 | 0,75 |
| 2017-11-11_00000077_1 | 0,91 | 0,86 | -    | -    | 0,5  | 0,69 | 0,78 | 0,91 |
| 2017-11-11_00000070_1 | 0,68 | 1    | 0,78 | 0,72 | 0,5  | 0,57 | 0,99 | 0,54 |
| 2017-11-11_00000057_1 | 0,82 | 0,86 | 0,62 | 0,69 | 0,5  | 0,61 | 0,85 | 0,5  |
| 2017-11-11_00000054_1 | 0,82 | 0,79 | 0,66 | 0,6  | 0,51 | 0,61 | 0,64 | 0,62 |
| 2017-11-11_00000052_1 | 0,79 | 0,78 | 0,68 | 0,69 | 0,5  | 0,69 | 0,81 | 0,78 |
| 2017-11-11_00000036_1 | 0,78 | 0,64 | 0,5  | 0,52 | 0,58 | 0,63 | 0,81 | 0,78 |
| 2017-11-11_00000027_2 | 0,99 | 0,91 | 0,83 | 0,65 | 0,55 | 0,68 | 0,98 | 0,92 |
| 2017-11-11_00000026_2 | 0,96 | 0,93 | 0,85 | 0,82 | 0,52 | 0,69 | 0,95 | 0,93 |
| 2017-11-11_00000025_2 | 0,96 | 0,93 | 0,82 | 0,73 | 0,52 | 0,72 | 0,97 | 0,94 |
| 2017-11-11_00000024_2 | 0,93 | 0,81 | 0,66 | 0,74 | 0,52 | 0,71 | 0,84 | 0,85 |
| 2017-11-11_00000020_1 | 0,63 | 0,83 | 0,6  | 0,6  | 0,51 | 0,58 | 0,74 | 0,66 |
| 2017-11-11_00000016_2 | 0,69 | 0,89 | 0,59 | 0,7  | 0,68 | 1    | 0,96 | 0,88 |
| 2017-11-11_00000010_1 | 0,84 | 0,8  | 0,58 | 0,65 | 0,51 | 0,61 | 0,8  | 0,86 |
| 2017-11-11_00000006_1 | 0,69 | 0,52 | 0,67 | 0,78 | 0,5  | 0,82 | 0,64 | 0,75 |
| 2017-11-04_00000068_1 | 0,97 | 0,73 | 0,71 | 0,77 | 0,5  | 0,66 | 0,98 | 0,89 |
| 2017-11-04_00000055_2 | 0,95 | 0,95 | 0,75 | 0,67 | 0,5  | 0,76 | 0,98 | 0,91 |
| 2017-11-04_00000048_1 | 0,86 | 0,65 | 0,63 | 0,51 | 0,55 | 0,59 | 0,85 | 0,77 |
| 2017-11-04_00000042_1 | 0,9  | 0,81 | 0,69 | 0,69 | 0,52 | 0,77 | 0,86 | 0,92 |
| 2017-11-04_00000037_1 | 0,94 | 0,83 | 0,69 | 0,68 | 0,5  | 0,65 | 0,89 | 0,87 |
| 2017-11-04_00000032_1 | 0,88 | 0,58 | 0,59 | 0,74 | 0,56 | 0,58 | 0,81 | 0,85 |
| 2017-11-04_00000023_2 | 0,81 | 0,87 | 0,71 | 0,83 | 0,5  | 0,68 | 0,67 | 0,76 |
| 2017-11-04_00000020_2 | 0,85 | 0,88 | 0,65 | 0,61 | 0,5  | 0,51 | 0,78 | 0,82 |
| 2017-11-04_00000013_1 | 0,87 | 0,83 | 0,74 | 0,75 | 0,5  | 0,64 | 0,85 | 0,88 |
| 2017-11-04_00000009_1 | 0,8  | 0,8  | 0,54 | -    | -    | 0,55 | 0,85 | 0,64 |
| 2017-10-28_00000134_1 | 0,77 | 0,87 | 0,59 | 0,57 | 0,75 | 0,51 | 0,9  | 0,98 |
| 2017-10-28_00000126_1 | 0,89 | 0,82 | 0,72 | 0,75 | 0,51 | 0,62 | 0,89 | 0,96 |
| 2017-10-28_00000119_1 | 0,79 | 0,86 | 0,71 | 0,63 | 0,5  | 0,65 | 0,95 | 0,9  |
| 2017-10-28_00000109_1 | 0,68 | 0,58 | 0,62 | 0,52 | 0,5  | 0,54 | 0,85 | 0,5  |

|                       |      |      |      |      |      |      |      |      |
|-----------------------|------|------|------|------|------|------|------|------|
| 2017-10-28_00000099_2 | 0,96 | 1    | -    | -    | 0,5  | 0,8  | -    | 0,5  |
| 2017-10-28_00000075_1 | 0,84 | 0,71 | 0,63 | 0,76 | 0,51 | 0,61 | 0,83 | 0,87 |
| 2017-10-28_00000074_1 | 0,86 | 0,85 | -    | -    | 0,5  | 0,67 | 0,92 | 0,92 |
| 2017-10-28_00000068_1 | 0,69 | 0,73 | 0,67 | 0,6  | 0,53 | 0,67 | 0,72 | 0,72 |
| 2017-10-28_00000067_1 | 0,75 | 0,83 | 0,68 | 0,64 | 0,51 | 0,69 | 0,87 | 0,99 |
| 2017-10-28_00000062_1 | 0,72 | 0,71 | 0,66 | 0,67 | 0,53 | 0,58 | 0,94 | 0,69 |
| 2017-10-28_00000061_1 | 0,55 | 0,57 | 0,63 | 0,62 | 0,51 | 0,59 | 0,87 | 0,92 |
| 2017-10-28_00000052_1 | 0,82 | 0,87 | 0,63 | 0,6  | 0,51 | 0,55 | 0,83 | 0,92 |
| 2017-10-28_00000044_1 | 0,93 | 0,84 | 0,51 | 0,57 | 0,52 | 0,74 | 0,71 | 0,96 |
| 2017-10-28_00000041_1 | -    | 0,56 | 0,68 | 0,91 | 0,82 | 0,68 | 0,91 | 0,86 |
| 2017-10-28_00000029_1 | 0,73 | 0,84 | 0,74 | 0,57 | 0,56 | 0,77 | 0,95 | 0,92 |
| 2017-10-28_00000027_2 | 0,91 | 0,91 | 0,63 | 0,68 | 0,5  | 0,64 | 0,95 | 0,91 |
| 2017-10-28_00000021_1 | 0,9  | 0,81 | 0,67 | 0,68 | 0,5  | 0,66 | 0,87 | 0,91 |
| 2017-10-21_00000060_2 | -    | 0,95 | -    | -    | -    | -    | -    | 0,59 |
| 2017-10-21_00000059_1 | 0,91 | 0,71 | -    | 0,76 | 0,51 | 0,68 | 0,91 | 0,51 |
| 2017-10-21_00000051_1 | 0,79 | 0,91 | 0,66 | 0,7  | 0,52 | 0,62 | 0,96 | 0,91 |
| 2017-10-21_00000036_1 | 0,7  | 0,84 | 0,67 | 0,73 | 0,62 | 0,68 | 0,86 | 0,96 |
| 2017-10-21_00000034_1 | 0,79 | 0,81 | 0,63 | 0,73 | 0,68 | 0,51 | 0,94 | 0,98 |
| 2017-10-21_00000032_1 | 0,79 | 0,79 | 0,75 | 0,64 | 0,85 | 0,72 | 0,87 | 0,91 |
| 2017-10-21_00000031_1 | 0,83 | 0,98 | 0,55 | 0,89 | 0,71 | 0,74 | 0,77 | 0,86 |
| 2017-10-21_00000029_1 | 0,64 | 0,78 | 0,79 | 0,69 | 0,69 | 0,6  | 0,88 | 0,74 |
| 2017-10-21_00000026_1 | 0,59 | 0,69 | 0,72 | 0,67 | 0,53 | 0,69 | 0,63 | 0,5  |
| 2017-10-21_00000023_1 | 0,64 | 0,54 | 0,69 | 0,71 | 0,51 | 0,6  | 0,76 | 0,57 |
| 2017-10-21_00000022_1 | -    | 0,85 | 1    | -    | 0,62 | 0,75 | 1    | 1    |
| 2017-10-21_00000020_1 | -    | -    | 0,79 | 0,67 | -    | 0,73 | -    | -    |
| 2017-10-21_00000019_1 | 0,84 | 0,85 | 0,7  | 0,69 | 0,5  | 0,67 | 0,86 | 0,91 |
| 2017-10-21_00000015_1 | 0,94 | 0,89 | 0,72 | 0,76 | 0,51 | 0,75 | 0,91 | 0,88 |
| 2017-10-21_00000012_1 | 0,92 | 0,86 | -    | 0,99 | 0,52 | 0,61 | 0,91 | 0,63 |
| 2017-10-21_00000006_1 | 0,91 | 0,71 | 0,56 | 0,57 | 0,51 | 0,62 | 0,89 | 0,93 |
| 2017-10-21_00000005_1 | 0,9  | 0,89 | 0,78 | 0,7  | 0,5  | 0,61 | 0,85 | 0,9  |
| 2017-10-21_00000002_1 | 0,71 | 0,74 | 0,89 | 0,64 | 0,76 | 0,63 | 0,86 | 1    |

**Supplementary Table 7.** Raw data for “Model Confidence” column of Table 1. Target ID refers to the CAMEO target. Please note that the model confidence is not defined in CAMEO when the local IDDT values for a given model are all greater or smaller than 0.6.
